# Supplementary material for: Agreement between results of meta-analyses from case reports and clinical studies, regarding efficacy and safety of idursulfase therapy in patients with mucopolysaccharidosis type II (MPS-II). A new tool for evidence-based medicine in rare diseases
Source: Orphanet J Rare Dis. 2019 Oct 21;14:230. doi: 10.1186/s13023-019-1202-6 (PMC6805333; doi:10.1186/s13023-019-1202-6)
Supplement: Supplementary file 2 — Additional file 2. This file includes all the references screened in the systematic review and the reason for exclusion. [file 13023_2019_1202_MOESM2_ESM.xlsx]

## Sheet: Hoja1
ID	REFERENCE	REVIEW	EXCLUDED	REASON FOR EXCLUSION
1	Pimentel N, Rodríguez-Lopez A, Díaz S, Losada JC, Díaz-Rincón DJ, Cardona C, Espejo-Mojica ÁJ, Ramírez AM1, Ruiz F, Landázuri P, Poutou-Piñales RA, Cordoba-Ruiz HA, Alméciga-Díaz CJ, Barrera-Avellaneda LA. Production and characterization of a human lysosomal recombinant iduronate-2-sulfatase produced in Pichia pastoris. Biotechnol Appl Biochem. 2018 Apr 6. DOI: 10.1002/bab.1660 Pubmed PMID: 29633…	Abstract	Yes	Yes. They did not study a clinical model.
2	Crowe L, Yaplito-Lee J, Anderson V, Peters H. Cognitive and behaviour profiles of children with mucopolysaccharidosis Type II. Cogn Neuropsychol. 2017. Sep;34(6):347-356. doi: 10.1080/02643294.2017.1401530. PubMed PMID: 29210605.	Article	Yes	Yes. Authors did not report efficacy of enzime replacement.
3	Franco JFDS, El Dib R, Agarwal A, Soares D, Milhan NVM, Albano LMJ, Kim CA. Mucopolysaccharidosis type I, II and VI and response to enzyme replacement therapy: Results from a single-center case series study. Intractable Rare Dis Res. 2017 Aug;6(3):183-190. doi: 10.5582/irdr.2017.01036. PubMed PMID: 28944140; PubMed Central PMCID: PMC5608928.	Article	Yes	Yes. The results are aggregated. They did not narrate individual cases.
4	Whiteman DA, Kimura A. Development of idursulfase therapy for mucopolysaccharidosis type II (Hunter syndrome): the past, the present and the future. Drug Des Devel Ther. 2017 Aug 23;11:2467-2480. doi: 10.2147/DDDT.S139601. eCollection 2017. Review. PubMed PMID: 28860717; PubMed Central PMCID: PMC5574592.	Abstract	Yes	Yes. It is a review without individual data.
5	Kim S, Whitley CB, Jarnes Utz JR. Correlation between urinary GAG and anti-idursulfase ERT neutralizing antibodies during treatment with NICIT immune tolerance regimen: A case report. Mol Genet Metab. 2017 Sep;122(1-2):92-99. doi: 10.1016/j.ymgme.2017.06.001. Epub 2017 Jun 3. PubMed PMID: 28610913.	Article	No
6	Ngu LH, Ong Peitee W, Leong HY, Chew HB. Case report of treatment experience with idursulfase beta (Hunterase) in an adolescent patient with MPS II. Mol Genet Metab Rep. 2017 May 11;12:28-32. doi: 10.1016/j.ymgmr.2017.05.002. eCollection 2017 Sep. PubMed PMID: 28540187; PubMed Central PMCID: PMC5432659.	Article	No
7	Straka M, Danisovic L, Bzduch V, Polak S, Varga I. The significance of electron microscopic examination of gingiva in cases of Hunter syndrome and hereditary gingival fibromatosis. Neuro Endocrinol Lett. 2016 Oct;37(5):353-360. PubMed PMID: 28171221.	Abstract	Yes	Yes. The results are aggregated. They did not narrate individual cases.
8	Polgreen LE, Kunin-Batson A, Rudser K, Vehe RK, Utz JJ, Whitley CB, Dickson P. Pilot study of the safety and effect of adalimumab on pain, physical function, and musculoskeletal disease in mucopolysaccharidosis types I and II. Mol Genet Metab Rep. 2017 Jan 15;10:75-80. doi: 10.1016/j.ymgmr.2017.01.002. eCollection 2017 Mar. PubMed PMID: 28119823; PubMed Central PMCID: PMC5238608.	Article	Yes	Yes. The results are aggregated. They did not narrate individual cases.
9	Nishiyama K, Imai T, Ohkubo K, Sanefuji M, Takada H. Resolution of Hydronephrosis in a Patient With Mucopolysaccharidosis Type II With Enzyme Replacement Therapy. Urology. 2017 Mar;101:163-165. doi: 10.1016/j.urology.2016.12.010. Epub 2016 Dec 20. PubMed PMID: 28011272.	Article	No
10	Hack HA, Walker R, Gardiner P. Anaesthetic implications of the changing management of patients with mucopolysaccharidosis. Anaesth Intensive Care. 2016 Nov;44(6):660-668. Review. PubMed PMID: 27832551.	Article	Yes	Yes. Authors did not include MPSII patients.
11	Yokoi T, Yokoi K, Akiyama K, Higuchi T, Shimada Y, Kobayashi H, Sato T, Ohteki T, Otsu M, Nakauchi H, Ida H, Ohashi T. Non-myeloablative preconditioning with ACK2 (anti-c-kit antibody) is efficient in bone marrow transplantation for murine models of mucopolysaccharidosis type II. Mol Genet Metab. 2016 Nov;119(3):232-238. doi: 0.1016/j.ymgme.2016.08.003. Epub 2016 Aug 21. PubMed PMID: 27590924.	Abstract	Yes	Yes. They did not study a clinical model.
12	Harmatz PR, Mengel E, Geberhiwot T, Muschol N, Hendriksz CJ, Burton BK, Jameson E, Berger KI, Jester A, Treadwell M, Sisic Z, Decker C. Impact of elosulfase alfa in patients with morquio A syndrome who have limited ambulation: An open-label, phase 2 study. Am J Med Genet A. 2017 Feb;173(2):375-383. doi: 10.1002/ajmg.a.38014. Epub 2016 Oct 24. PubMed PMID: 27774754; PubMed Central PMCID: PMC529802…	Abstract	Yes	Yes. Authors did not include MPSII patients.
13	Motas S, Haurigot V, Garcia M, Marcó S, Ribera A, Roca C, Sánchez X, Sánchez V, Molas M, Bertolin J, Maggioni L, León X, Ruberte J, Bosch F. CNS-directed gene therapy for the treatment of neurologic and somatic mucopolysaccharidosis type II (Hunter syndrome). JCI Insight. 2016 Jun 16;1(9):e86696. PubMed PMID: 27699273; PubMed Central PMCID: PMC5033872.	Abstract	Yes	Yes. They did not study a clinical model.
14	Řeboun M, Rybová J, Dobrovolný R, Včelák J, Veselková T, Štorkánová G, Mušálková D, Hřebíček M, Ledvinová J, Magner M, Zeman J, Pešková K, Dvořáková L. X-Chromosome Inactivation Analysis in Different Cell Types and Induced Pluripotent Stem Cells Elucidates the Disease Mechanism in a Rare Case of Mucopolysaccharidosis Type II in a Female. Folia Biol (Praha). 2016;62(2):82-9. PubMed PMID: 27187040.	Article	Yes	The patients analyzed were women.
15	Capanoglu M, Dibek Misirlioglu E, Azkur D, Vezir E, Guvenir H, Gunduz M, Toyran M, Civelek E, Kocabas CN. IgE-Mediated Hypersensitivity and Desensitisation with Recombinant Enzymes in Pompe Disease and Type I and Type VI Mucopolysaccharidosis. Int Arch Allergy Immunol. 2016;169(3):198-202. doi:10.1159/000446154. Epub 2016 May 4. PubMed PMID: 27144408.	Abstract	Yes	Yes. Authors did not include MPSII patients.
16	Shapiro EG, Rudser K, Ahmed A, Steiner RD, Delaney KA, Yund B, King K, Kunin-Batson A, Eisengart J, Whitley CB. A longitudinal study of emotional adjustment, quality of life and adaptive function in attenuated MPS II. Mol Genet Metab Rep. 2016 Apr 1;7:32-9. doi: 10.1016/j.ymgmr.2016.03.005. eCollection 2016 Jun. PubMed PMID: 27114914; PubMed Central PMCID: PMC4832084.	Article	Yes	Yes. Authors did not report efficacy of enzime replacement.
17	15: Parini R, Rigoldi M, Tedesco L, Boffi L, Brambilla A, Bertoletti S, Boncimino A, Del Longo A, De Lorenzo P, Gaini R, Gallone D, Gasperini S, Giussani C, Grimaldi M, Grioni D, Meregalli P, Messinesi G, Nichelli F, Romagnoli M, Russo P, Sganzerla E, Valsecchi G, Biondi A. Enzymatic replacement therapy for Hunter disease: Up to 9 years experience with 17 patients. Mol Genet Metab Rep. 2015 Apr 2…	Article	Yes	Yes. The results are aggregated. They did not narrate individual cases.
18	Parini R, Jones SA, Harmatz PR, Giugliani R, Mendelsohn NJ. The natural history of growth in patients with Hunter syndrome: Data from the Hunter Outcome Survey (HOS). Mol Genet Metab. 2016 Apr;117(4):438-46. doi: 10.1016/j.ymgme.2016.01.009. Epub 2016 Jan 25. PubMed PMID: 26846156.	Abstract	Yes	Yes. Authors did not report efficacy of enzime replacement.
19	Ghosh A, Miller W, Orchard PJ, Jones SA, Mercer J, Church HJ, Tylee K, Lund T, Bigger BW, Tolar J, Wynn RF. Enzyme replacement therapy prior to haematopoietic stem cell transplantation in Mucopolysaccharidosis Type I: 10 year combined experience of 2 centres. Mol Genet Metab. 2016 Mar;117(3):373-7. doi: 10.1016/j.ymgme.2016.01.011. Epub 2016 Jan 27. PubMed PMID: 26832957; PubMed Central PMCID: PM…	Article	Yes	Yes. The results are aggregated. They did not narrate individual cases.
20	Giugliani R, Federhen A, Vairo F, Vanzella C, Pasqualim G, da Silva LM, Giugliani L, de Boer AP, de Souza CF, Matte U, Baldo G. Emerging drugs for the treatment of mucopolysaccharidoses. Expert Opin Emerg Drugs. 2016;21(1):9-26. doi: 10.1517/14728214.2016.1123690. Epub 2016 Jan 9. Review. PubMed PMID: 26751109.	Abstract	Yes	Yes. It is a review without individual data.
21	Kishnani PS, Dickson PI, Muldowney L, Lee JJ, Rosenberg A, Abichandani R, Bluestone JA, Burton BK, Dewey M, Freitas A, Gavin D, Griebel D, Hogan M, Holland S, Tanpaiboon P, Turka LA, Utz JJ, Wang YM, Whitley CB, Kazi ZB, Pariser AR. Immune response to enzyme replacement therapies in lysosomal storage diseases and the role of immune tolerance induction. Mol Genet Metab. 2016 Feb;117(2):66-83. doi:…	Abstract	Yes	Yes. It is a review without individual data.
22	Sharma R, Anguela XM, Doyon Y, Wechsler T, DeKelver RC, Sproul S, Paschon DE, Miller JC, Davidson RJ, Shivak D, Zhou S, Rieders J, Gregory PD, Holmes MC, Rebar EJ, High KA. In vivo genome editing of the albumin locus as a platform for protein replacement therapy. Blood. 2015 Oct 8;126(15):1777-84. doi: 10.1182/blood-2014-12-615492. Epub 2015 Aug 21. PubMed PMID: 26297739; PubMed Central PMCID: PM…	Abstract	Yes	Yes. They did not study a clinical model.
23	Gupta A, Uttarilli A, Dalal A, Girisha KM. Hunter syndrome with late age of presentation: clinical description of a case and review of the literature. BMJ Case Rep. 2015 May 14;2015. pii: bcr2015209305. doi: 10.1136/bcr-2015-209305. PubMed PMID: 25976201; PubMed Central PMCID: PMC4434300. Same patient than 23.	Article	No	No. It is the same case than 23. But authors did not report efficacy nor safety of ERT.
24	Madireddi J, P S, Shetty RK, Prabhu M, K M G. Hunter syndrome with its typical heart: a close mimic to rheumatic heart. BMJ Case Rep. 2015 May pii: bcr2015209359. doi: 10.1136/bcr-2015-209359. Erratum in: BMJ Case Rep. 2016;2016. pii: bcr2015209359corr1. doi: 10.1136/bcr-2015-209359corr1. PubMed PMID: 25952974; PubMed Central PMCID: PMC4434344. Same patient than 22.	Article	No	No. It is the same case than 22. The author reports efficacy of the ERT.
25	Steward M, Berezovskaya Y, Zhou H, Shediac R, Sun C, Miller N, Rendle PM. Recombinant, truncated B. circulans keratanase-II: Description and characterisation of a novel enzyme for use in measuring urinary keratan sulphate levels via LC-MS/MS in Morquio A syndrome. Clin Biochem. 2015 Aug;48(12):796-802. doi: 10.1016/j.clinbiochem.2015.03.024. Epub 2015 Apr 10. PubMed PMID: 25866399.	Abstract	Yes	Yes. Authors did not include MPSII patients.
26	Żuber Z, Jurecka A, Jurkiewicz E, Kieć-Wilk B, Tylki-Szymańska A. Cervical spine MRI findings in patients with Mucopolysaccharidosis type II. Pediatr Neurosurg. 2015;50(1):26-30. doi: 10.1159/000371658. Epub 2015 Feb 25. PubMed PMID: 25721852.	Article	Yes	Yes. Authors did not report efficacy of enzime replacement.
27	Kim KH, Messinger YH, Burton BK. Successful reduction of high-sustained anti-idursulfase antibody titers by immune modulation therapy in a patient with severe mucopolysaccharidosis type II. Mol Genet Metab Rep. 2014 Nov 27;2:20-24. doi: 10.1016/j.ymgmr.2014.11.007. eCollection 2015 Mar. PubMed PMID: 28649520; PubMed Central PMCID: PMC5471157.	Article	No
28	Alegra T, Eizerik DP, de Cerqueira CC, Pereira TV, Dornelles AD, Schwartz IV. [Efficacy and safety of idursulfase therapy in patients with mucopolysaccharidosis type II with and without comparison to placebo: systematic review and meta-analysis]. Cad Saude Publica. 2013 Nov;29 Suppl 1:S45-58. Review. Portuguese. PubMed PMID: 25402250.	Abstract	Yes	Yes. It is a review without individual data. Es el 103
29	Needham M, Packman W, Quinn N, Rappoport M, Aoki C, Bostrom A, Cordova M, Macias S, Morgan C, Packman S. Health-Related Quality of Life in Patients with MPS II. J Genet Couns. 2015 Aug;24(4):635-44. doi: 10.1007/s10897-014-9791-7. Epub 2014 Nov 14. PubMed PMID: 25395377.	Article	Yes	Yes. The results are aggregated. They did not narrate individual cases.
30	Szegedi M, Molnár MJ, Boncz I, Kosztolányi G. [Shift of focus in the financing of Hungarian drugs. Reimbursement for orphan drugs for treating rare diseases: financing of enzyme replacement therapy in Hungary]. Orv Hetil. 2014 Nov 2;155(44):1735-41. doi: 10.1556/OH.2014.30031. Review. Hungarian. PubMed PMID: 25344850.	Abstract	Yes	Yes. It is a review without individual data.
31	Noh TK, Han JS, Won CH, Chang S, Choi JH, Moon KC, Lee MW, Yang JH, Soung JH. Characteristic "pebbling" skin eruption as a presenting sign of Hunter syndrome. Int J Dermatol. 2014 Dec;53(12):e594-6. doi: 10.1111/ijd.12206. Epub 2014 Sep 30. PubMed PMID: 25267496.	Article	No
32	Chuang CK, Lin HY, Wang TJ, Tsai CC, Liu HL, Lin SP. A modified liquid chromatography/tandem mass spectrometry method for predominant disaccharide units of urinary glycosaminoglycans in patients with mucopolysaccharidoses. Orphanet J Rare Dis. 2014 Sep 2;9:135. doi: 10.1186/s13023-014-0135-3. PubMed PMID: 25178307; PubMed Central PMCID: PMC4164790.	Article	Yes	Yes. The results are aggregated. They did not narrate individual cases.
33	Shimada T, Kelly J, LaMarr WA, van Vlies N, Yasuda E, Mason RW, Mackenzie W, Kubaski F, Giugliani R, Chinen Y, Yamaguchi S, Suzuki Y, Orii KE, Fukao T, Orii T, Tomatsu S. Novel heparan sulfate assay by using automated high-throughput mass spectrometry: Application to monitoring and screening for mucopolysaccharidoses. Mol Genet Metab. 2014 Sep-Oct;113(1-2):92-9. doi: 10.1016/j.ymgme.2014.07.008. …	Article	Yes	Yes. Authors did not report efficacy of enzime replacement.
34	Negretto GW, Deon M, Biancini GB, Burin MG, Giugliani R, Vargas CR. Glycosaminoglycans can be associated with oxidative damage in mucopolysaccharidosis II patients submitted to enzyme replacement therapy. Cell Biol Toxicol. 2014 Aug;30(4):189-93. doi: 10.1007/s10565-014-9284-3. Epub 2014 Jul 15. PubMed PMID: 25022704.	Article	Yes	Yes. The results are aggregated. They did not narrate individual cases.
35	Lampe C, Bosserhoff AK, Burton BK, Giugliani R, de Souza CF, Bittar C, Muschol N, Olson R, Mendelsohn NJ. Long-term experience with enzyme replacement therapy (ERT) in MPS II patients with a severe phenotype: an international case series. J Inherit Metab Dis. 2014 Sep;37(5):823-9. doi: 10.1007/s10545-014-9686-7. Epub 2014 Mar 5. PubMed PMID: 24596019; PubMed Central PMCID: PMC4158409.	Article	Yes	Yes. The results are aggregated. They did not narrate individual cases.
36	Lampe C, Atherton A, Burton BK, Descartes M, Giugliani R, Horovitz DD, Kyosen SO, Magalhães TS, Martins AM, Mendelsohn NJ, Muenzer J, Smith LD. Enzyme Replacement Therapy in Mucopolysaccharidosis II Patients Under 1 Year of Age. JIMD Rep. 2014;14:99-113. doi: 10.1007/8904_2013_289. Epub 2014 Feb 11. PubMed PMID: 24515576; PubMed Central PMCID: PMC4213327.	Article	No
37	Polgreen LE, Thomas W, Orchard PJ, Whitley CB, Miller BS. Effect of recombinant human growth hormone on changes in height, bone mineral density, and body composition over 1-2 years in children with Hurler or Hunter syndrome. Mol Genet Metab. 2014 Feb;111(2):101-6. doi: 10.1016/j.ymgme.2013.11.013. Epub 2013 Dec 11. PubMed PMID: 24368158; PubMed Central PMCID: PMC4018305.	Article	Yes	Yes. The results are aggregated. They did not narrate individual cases.
38	Tummolo A, Gabrielli O, Gaeta A, Masciopinto M, Zampini L, Pavone LM, Di Natale P, Papadia F. Bisphosphonate Treatment in a Patient Affected by MPS IVA with Osteoporotic Phenotype. Case Rep Med. 2013;2013:891596. doi: 10.1155/2013/891596. Epub 2013 Nov 18. PubMed PMID: 24348578; PubMed Central PMCID: PMC3855944.	Abstract	Yes	Yes. Authors did not include MPSII patients.
39	Wang RY, Braunlin EA, Rudser KD, Dengel DR, Metzig AM, Covault KK, Polgreen LE, Shapiro E, Steinberger J, Kelly AS. Carotid intima-media thickness is increased in patients with treated mucopolysaccharidosis types I and II, and correlates with arterial stiffness. Mol Genet Metab. 2014 Feb;111(2):128-32. doi: 10.1016/j.ymgme.2013.11.001. Epub 2013 Nov 12. PubMed PMID: 24268528; PubMed Central PMCID…	Article	Yes	Yes. The results are aggregated. They did not narrate individual cases.
40	Szymańska A. Effect of rapid cessation of enzyme replacement therapy: a report of 5 more cases. Mol Genet Metab. 2014 Feb;111(2):212-3. doi: 10.1016/j.ymgme.2013.08.019. Epub 2013 Sep 6. PubMed PMID: 24060239.	Article	Yes	Yes. It is the same case than 54. But only cesation is reported. The improvement after ERT is not clearly evaluated.
41	Annibali R, Caponi L, Morganti A, Manna M, Gabrielli O, Ficcadenti A. Hunter syndrome (Mucopolysaccharidosis type II), severe phenotype: long term follow-up on patients undergone to hematopoietic stem cell transplantation. Minerva Pediatr. 2013 Oct;65(5):487-96. PubMed PMID: 24056375.	Abstract	Yes	Yes. Authors did not report efficacy of enzime replacement.
42	Lee SH, Kim J, Choi JH, Yun KW, Sohn CB, Han DC, Kim JS, Park YH, Kim JH, Chun KJ. Severe mitral stenosis secondary to Hunter's syndrome. Circulation. 2013 Sep 10;128(11):1269-70. doi: 10.1161/CIRCULATIONAHA.113.001688. PubMed PMID: 24019448.	Article	Yes	Yes. Authors did not report efficacy of enzime replacement.
43	Ceravolo F, Mascaro I, Sestito S, Pascale E, Lauricella A, Dizione E, Concolino D. Home treatment in paediatric patients with Hunter syndrome: the first Italian experience. Ital J Pediatr. 2013 Sep 9;39:53. doi: 10.1186/1824-7288-39-53. PubMed PMID: 24011228; PubMed Central PMCID: PMC3847888.	Article	Yes	Yes. Authors did not report efficacy of enzime replacement.
44	Malik V, Nichani J, Rothera MP, Wraith JE, Jones SA, Walker R, Bruce IA. Tracheostomy in mucopolysaccharidosis type II (Hunter's Syndrome). Int J Pediatr Otorhinolaryngol. 2013 Jul;77(7):1204-8. doi: 10.1016/j.ijporl.2013.05.002. Epub 2013 May 31. PubMed PMID: 23726952.	Article	Yes	Yes. Authors did not report efficacy of enzime replacement.
45	Christianto A, Watanabe H, Nakajima T, Inazu T. Idursulfase enzyme replacement therapy in an adult patient with severe Hunter syndrome having a novel mutation of iduronate-2-sulfatase gene. Clin Chim Acta. 2013 Aug 23;423:66-8. doi: 10.1016/j.cca.2013.04.022. Epub 2013 Apr 30. PubMed PMID: 23726270.	Article	No
46	Buraczewska M, O'Leary D, Walsh O, Monavari A, Crushell E. Parental experience of enzyme replacement therapy for Hunter syndrome. Ir Med J. 2013 Apr;106(4):120-2. PubMed PMID: 23691848.	Article	Yes	Yes. The results are aggregated. They did not narrate individual cases.
47	Volpi N, Zampini L, Maccari F, Santoro L, Galeotti F, Galeazzi T, Gabrielli O, Coppa GV. Plasmatic kinetics of dermatan sulfate during enzyme replacement therapy with iduronate-2-sulfatase in a mucopolysaccharidosis II patient. Glycoconj J. 2013 Oct;30(7):727-32. doi: 10.1007/s10719-013-9471-0. Epub 2013 Mar 20. PubMed PMID: 23512580.	Article	No
48	Quaio CR, Grinberg H, Vieira ML, Paula AC, Leal GN, Gomy I, Leistner-Segal S, Giugliani R, Bertola DR, Kim CA. Report of a Large Brazilian Family With a Very Attenuated Form of Hunter Syndrome (MPS II). JIMD Rep. 2012;4:125-8. doi: 10.1007/8904_2011_90. Epub 2011 Nov 8. PubMed PMID: 23430907; PubMed Central PMCID: PMC3509904.	Article	Yes	Yes. Authors did not report efficacy of enzime replacement.
49	Coppa GV, Buzzega D, Zampini L, Maccari F, Santoro L, Galeotti F, Galeazzi T, Gabrielli O, Volpi N. Plasmatic and Urinary Glycosaminoglycans Characterization in Mucopolysaccharidosis II Patient Treated with Enzyme-Replacement The+D60rapy with Idursulfase. JIMD Rep. 2012;4:79-90. doi: 10.1007/8904_2011_75. Epub 2011 Nov 4. PubMed PMID: 23430900; PubMed Central PMCID: PMC3509895.	Article	Yes	Yes. The results are aggregated. They did not narrate individual cases.
50	Sato Y, Fujiwara M, Kobayashi H, Ida H. Massive accumulation of glycosaminoglycans in the aortic valve of a patient with Hunter syndrome during enzyme replacement therapy. Pediatr Cardiol. 2013;34(8):2077-9. doi:10.1007/s00246-013-0653-0. Epub 2013 Feb 13. PubMed PMID: 23404265; PubMed Central PMCID: PMC3825558.	Article	No
51	Tajima G, Sakura N, Kosuga M, Okuyama T, Kobayashi M. Effects of idursulfase enzyme replacement therapy for Mucopolysaccharidosis type II when started in early infancy: comparison in two siblings. Mol Genet Metab. 2013 Mar;108(3):172-7. doi: 10.1016/j.ymgme.2012.12.010. Epub 2013 Jan 9. PubMed PMID: 23375472.	Article	No
52	Puiu M, Chirita-Emandi A, Dumitriu S, Arghirescu S. Hunter syndrome follow-up after 1 year of enzyme-replacement therapy. BMJ Case Rep. 2013 Jan 9;2013. pii: bcr2012007644. doi: 10.1136/bcr-2012-007644. PubMed PMID: 23307460; PubMed Central PMCID: PMC3603921.	Article	No
53	Huynh HT, Grubb JH, Vogler C, Sly WS. Biochemical evidence for superior correction of neuronal storage by chemically modified enzyme in murine mucopolysaccharidosis VII. Proc Natl Acad Sci U S A. 2012 Oct 16;109(42):17022-7. doi: 10.1073/pnas.1214779109. Epub 2012 Oct 1. PubMed PMID: 23027951; PubMed Central PMCID: PMC3479451.	Abstract	Yes	Yes. They did not study a clinical model.
54	Winquist E, Bell CM, Clarke JT, Evans G, Martin J, Sabharwal M, Gadhok A, Stevenson H, Coyle D. An evaluation framework for funding drugs for rare diseases. Value Health. 2012 Sep-Oct;15(6):982-6. doi: 10.1016/j.jval.2012.06.009. PubMed PMID: 22999151.	Abstract	Yes	Yes. It is a review without individual data.
55	Jurecka A, Żuberuber Z, Opoka-Winiarska V, Węgrzyn G, Tylki-Szymańska A. Effect of rapid cessation of enzyme replacement therapy: a report of 5 cases and a review of the literature. Mol Genet Metab. 2012 Nov;107(3):508-12. doi:10.1016/j.ymgme.2012.08.013. Epub 2012 Aug 17. Review. PubMed PMID: 22926198.	Article	Yes	Yes. It is the same case than 39. But only cesation is reported. The improvement after ERT is not clearly evaluated.
56	Uluganyan M, Velibey Y, Karaca G, Güngör B. Echocardiographic demonstration of isolated mitral valve involvement in a patient with mucopolysaccharidosis. Turk Kardiyol Dern Ars. 2012 Mar;40(2):199. doi: 10.5543/tkda.2012.01795. PubMed PMID: 22710598.	Article	Yes	Yes. Authors did not report efficacy of enzime replacement.
57	Ratko TA, Belinson SE, Brown HM, Noorani HZ, Chopra RD, Marbella A, Samson DJ, Bonnell CJ, Ziegler KM, Aronson N. Hematopoietic Stem-Cell Transplantation in the Pediatric Population [Internet]. Rockville (MD): Agency for Healthcare Research and Quality (US); 2012 Feb. Available from http://www.ncbi.nlm.nih.gov/books/NBK84626/ PubMed PMID: 22439159.	Article	Yes	Yes. It is a review without individual data.
58	Burton BK, Giugliani R. Diagnosing Hunter syndrome in pediatric practice: practical considerations and common pitfalls. Eur J Pediatr. 2012 Apr;171(4):631-9. doi: 10.1007/s00431-012-1703-y. Epub 2012 Mar 1. PubMed PMID: 22383073; PubMed Central PMCID: PMC3306562.	Article	Yes	Yes. Authors did not report efficacy of enzime replacement.
59	Serrano CD, Gomez JF. Successful desensitization to idursulfase in a patient with type II ucopolysaccharidosis (Hunter syndrome). J Investig Allergol Clin Immunol. 2011;21(7):571-2. PubMed PMID: 22312944.	Article	Yes	Yes. Authors did not report efficacy of enzime replacement.
60	Jurecka A, Krumina Z, Żuber Z, Różdżyńska-Świątkowska A, Kłoska A, Czartoryska B, Tylki-Szymańska A. Mucopolysaccharidosis type II in females and response to enzyme replacement therapy. Am J Med Genet A. 2012 Feb;158A(2):450-4. doi: 10.1002/ajmg.a.34415. Epub 2012 Jan 13. PubMed PMID: 22246721.	Article	Yes	Yes. The patients analyzed were women.
61	Sohn YB, Choi EW, Kim SJ, Park SW, Kim SH, Cho SY, Jeong SI, Huh J, Kang IS, Lee HJ, Paik KH, Jin DK. Retrospective analysis of the clinical manifestations and survival of Korean patients with mucopolysaccharidosis type II: emphasis on the cardiovascular complication and mortality cases. Am J Med Genet A. 2012 Jan;158A(1):90-6. doi: 10.1002/ajmg.a.34371. Epub 2011 Nov 21. PubMed PMID: 22105882.	Abstract	Yes	Yes. The results are aggregated. They did not narrate individual cases.
62	Marín LL, Gutiérrez-Solana LG, Fernández AT. Hunter syndrome: resolution of extensive typical skin lesions after 9 months of enzyme replacement therapy with idursulfase. Pediatr Dermatol. 2012 May-Jun;29(3):369-70. doi: 10.1111/j.1525-1470.2011.01418.x. Epub 2011 Oct 13. PubMed PMID: 21995841.	Article	No
63	Hoffmann B, Schulze-Frenking G, Al-Sawaf S, Beck M, Mayatepek E. Hunter disease before and during enzyme replacement therapy. Pediatr Neurol. 2011 Sep;45(3):181-4. doi: 10.1016/j.pediatrneurol.2011.05.010. PubMed PMID: 21824567.	Article	No
64	Tylki-Szymanska A, Jurecka A, Zuber Z, Rozdzynska A, Marucha J, Czartoryska B. Enzyme replacement therapy for mucopolysaccharidosis II from 3 months of age: a 3-year follow-up. Acta Paediatr. 2012 Jan;101(1):e42-7. doi: 10.1111/j.1651-2227.2011.02385.x. Epub 2011 Jun 29. PubMed PMID: 21672014.	Article	No
65	Felice BR, Wright TL, Boyd RB, Butt MT, Pfeifer RW, Pan J, Ruiz JA, Heartlein MW, Calias P. Safety evaluation of chronic intrathecal administration of idursulfase-IT in cynomolgus monkeys. Toxicol Pathol. 2011 Aug;39(5):879-92. doi: 10.1177/0192623311409595. Epub 2011 May 31. PubMed PMID: 21628718.	Abstract	Yes	Yes. They did not study a clinical model.
66	Papadia F, Lozupone MS, Gaeta A, Capodiferro D, Lacalendola G. Long-term enzyme replacement therapy in a severe case of mucopolysaccharidosis type II (Hunter syndrome). Eur Rev Med Pharmacol Sci. 2011 Mar;15(3):253-8. PubMed PMID: 21528770.	Article	No
67	Pérez-Calvo J, Bergua Sanclemente I, López Moreno MJ, Torralba Cabeza MÁ, Amores Arriaga B. [Early response to idursulfase in a 31-year old male patient with Hunter syndrome]. Rev Clin Esp. 2011 Jul-Aug;211(7):e42-5. doi: 10.1016/j.rce.2011.01.014. Epub 2011 Apr 27. Spanish. PubMed PMID: 21524741.	Article	No
68	Tchan MC, Devine KT, Sillence DO. Three Adult Siblings with Mucopolysaccharidosis Type II (Hunter Syndrome): A Report on Clinical Heterogeneity and 12 Months of Therapy with Idursulfase. JIMD Rep. 2011;1:57-64. doi: 10.1007/8904_2011_17. Epub 2011 Jun 22. PubMed PMID: 23430829; PubMed Central PMCID: PMC3509811.	Article	No
69	Auray-Blais C, Bhérer P, Gagnon R, Young SP, Zhang HH, An Y, Clarke JT, Millington DS. Efficient analysis of urinary glycosaminoglycans by LC-MS/MS in mucopolysaccharidoses type I, II and VI. Mol Genet Metab. 2011 Jan;102(1):49-56. doi: 10.1016/j.ymgme.2010.09.003. Epub 2010 Sep 17. PubMed PMID: 20934363.	Abstract	Yes	Yes. The results are aggregated. They did not narrate individual cases.
70	Davison JE, Hendriksz CJ, Sun Y, Davies NP, Gissen P, Peet AC. Quantitative in vivo brain magnetic resonance spectroscopic monitoring of neurological involvement in mucopolysaccharidosis type II (Hunter Syndrome). J Inherit Metab Dis. 2010 Dec;33 Suppl 3:S395-9. doi: 10.1007/s10545-010-9197-0. Epub 2010 Oct 1. PubMed PMID: 20886296.	Abstract	Yes	Yes. Authors did not report efficacy of enzime replacement.
71	Alcalde-Martín C, Muro-Tudelilla JM, Cancho-Candela R, Gutiérrez-Solana LG, Pintos-Morell G, Martí-Herrero M, Munguira-Aguado P, Galán-Gómez E. First experience of enzyme replacement therapy with idursulfase in Spanish patients with Hunter syndrome under 5 years of age: case observations from the Hunter Outcome Survey (HOS). Eur J Med Genet. 2010 Nov-Dec;53(6):371-7. doi: 10.1016/j.ejmg.2010.07.0…	Article	Yes	Yes. The results are aggregated. They did not narrate individual cases.
72	Fung EB, Johnson JA, Madden J, Kim T, Harmatz P. Bone density assessment in patients with mucopolysaccharidosis: A preliminary report from patients with MPS II and VI. J Pediatr Rehabil Med. 2010;3(1):13-23. PubMed PMID: 20617160; PubMed Central PMCID: PMC2898152.	Article	Yes	Yes. The results are aggregated. They did not narrate individual cases.
73	Manara R, Rampazzo A, Cananzi M, Salviati L, Mardari R, Drigo P, Tomanin R, Gasparotto N, Priante E, Scarpa M. Hunter syndrome in an 11-year old girl on enzyme replacement therapy with idursulfase: brain magnetic resonance imaging features and evolution. J Inherit Metab Dis. 2010 Dec;33 Suppl 3:S67-72. doi: 10.1007/s10545-009-9023-8. Epub 2010 Jan 6. PubMed PMID: 20052546.	Article	No
74	Wang RY, Cambray-Forker EJ, Ohanian K, Karlin DS, Covault KK, Schwartz PH, Abdenur JE. Treatment reduces or stabilizes brain imaging abnormalities in patients with MPS I and II. Mol Genet Metab. 2009 Dec;98(4):406-11. doi: 10.1016/j.ymgme.2009.07.015. Epub 2009 Aug 5. PubMed PMID: 19748810.	Article	No
75	Dziedzic D, Wegrzyn G, Jakóbkiewicz-Banecka J. Impairment of glycosaminoglycan synthesis in mucopolysaccharidosis type IIIA cells by using siRNA: a potential therapeutic approach for Sanfilippo disease. Eur J Hum Genet. 2010 Feb;18(2):200-5. doi: 10.1038/ejhg.2009.144. Epub 2009 Aug 19. PubMed PMID: 19690584; PubMed Central PMCID: PMC2987185.	Abstract	Yes	Yes. Authors did not include MPSII patients.
76	Wood M, Cleary MA, Alderson L, Vellodi A. Changes in gait pattern as assessed by the GAITRite™ walkway system in MPS II patients undergoing enzyme replacement therapy. J Inherit Metab Dis. 2009 Dec;32 Suppl 1:S127-35. doi: 10.1007/s10545-009-1103-2. Epub 2009 Mar 25. PubMed PMID: 19319660.	Article	Yes	Yes. The results are aggregated. They did not narrate individual cases.
77	Little C, Gould R, Hendriksz C. The management of children with Hunter syndrome - a case study. Br J Nurs. 2009 Mar 12-25;18(5):321-2. PubMed PMID: 19273994.	Article	Yes	Yes. Authors did not report efficacy of enzime replacement.
78	Chen J, Jiang H, Dong L, Wang Y, Luo C, Zhou M, Zhang W, Huang S, Gu X, Qiu W, Zhang H, Gu L. [Treatment of 2 children with mucopolysaccharidosis by allogeneic hematopoietic stem cell transplantation]. Zhonghua Yi Xue Yi Chuan Xue Za Zhi. 2008 Dec;25(6):675-7. Chinese. PubMed PMID: 19065530.	Abstract	Yes	Yes. Authors did not report efficacy of enzime replacement.
79	Bagewadi S, Roberts J, Mercer J, Jones S, Stephenson J, Wraith JE. Home treatment with Elaprase and Naglazyme is safe in patients with mucopolysaccharidoses types II and VI, respectively. J Inherit Metab Dis. 2008 Dec;31(6):733-7. doi: 10.1007/s10545-008-0980-0. Epub 2008 Oct 19. PubMed PMID: 18923918.	Article	Yes	Yes. Authors did not report efficacy of enzime replacement.
80	Laney DJ, White AL, Rhead WJ, Fernhoff P. Creating genetics-based infusion centers: a case study of two models. Genet Med. 2008 Aug;10(8):626-32. doi: 10.1097GIM.0b013e31818050a2. PubMed PMID: 18641514.	Article	Yes	Yes. Authors did not report efficacy of enzime replacement.
81	Wraith JE, Beck M, Giugliani R, Clarke J, Martin R, Muenzer J; HOS Investigators. Initial report from the Hunter Outcome Survey. Genet Med. 2008 Jul;10(7):508-16. doi: 10.1097GIM.0b013e31817701e6. PubMed PMID: 18580692.	Article	Yes	Yes. The results are aggregated. They did not narrate individual cases.
82	Galán-Gómez E, Guerrero-Rico A, Cáceres-Marzal C, Zambrano-Castaño M, Moreno-Tejero ML, Grande-Tejada AM, Fernández-Hernández S, Vaquerizo-Madrid J, Cardesa-García JJ. Early response to idursulfase treatment in a 3 year-old boy affected of Hunter syndrome. Eur J Med Genet. 2008 May-Jun;51(3):268-71. doi: 10.1016/j.ejmg.2008.02.005. Epub 2008 Mar 4. PubMed PMID: 18396123.	Article	No
83	Martin R, Beck M, Eng C, Giugliani R, Harmatz P, Muñoz V, Muenzer J. Recognition and diagnosis of mucopolysaccharidosis II (Hunter syndrome). Pediatrics. 2008 Feb;121(2):e377-86. doi: 10.1542/peds.2007-1350. Review. PubMed PMID: 18245410.	Abstract	Yes	Yes. It is a review without individual data.
84	Ogunbiyi A, Adeyinka AO, Ogah SO, Baiyeroju AM. Hunter syndrome: case report and review of literature. West Afr J Med. 2006 Apr-Jun;25(2):169-72. Review. PubMed PMID: 16918195.	Article	Yes	Yes. Authors did not report efficacy of enzime replacement.
85	Harmatz P, Kramer WG, Hopwood JJ, Simon J, Butensky E, Swiedler SJ; Mucopolysaccharidosis VI Study Group. Pharmacokinetic profile of recombinant human N-acetylgalactosamine 4-sulphatase enzyme replacement therapy in patients with mucopolysaccharidosis VI (Maroteaux-Lamy syndrome): a phase I/II study. Acta Paediatr Suppl. 2005 Mar;94(447):61-8; discussion 57. PubMed PMID: 15895715.	Abstract	Yes	Yes. Authors did not include MPSII patients.
86	Wraith JE. The first 5 years of clinical experience with laronidase enzyme replacement therapy for mucopolysaccharidosis I. Expert Opin Pharmacother. 2005 Mar;6(3):489-506. Review. PubMed PMID: 15794739.	Abstract	Yes	Yes. Authors did not include MPSII patients.
87	Muenzer J, Lamsa JC, Garcia A, Dacosta J, Garcia J, Treco DA. Enzyme replacement therapy in mucopolysaccharidosis type II (Hunter syndrome): a preliminary report. Acta Paediatr Suppl. 2002;91(439):98-9. Review. PubMed PMID: 12572850.	Abstract	Yes	Yes. They did not study a clinical model.
88	Liu S, Li L, Fu J, Zhong C, Lu G. [The detection of the frequent mutations of iduronate-2-sulphatase gene in mucopolysaccharidosis type II patients in Chinese]. Zhonghua Yi Xue Yi Chuan Xue Za Zhi. 2002 Jun;19(3):243-5. Chinese. PubMed PMID: 12048688.	Abstract	Yes	Yes. Authors did not report efficacy of enzime replacement.
89	Meyer S, Thornley M, Wynn RF, Brennan BM, Carr T, Wraith JE, Will AM. Donor bone marrow from a sibling with inborn error of metabolism for treatment of acute leukaemia - clinical and biochemical consequences in the non-affected recipient. Bone Marrow Transplant. 2000 Apr;25(8):909-11. PubMed PMID: 10808215.	Abstract	Yes	Yes. Authors did not report efficacy of enzime replacement.
90	Vellodi A, Young E, Cooper A, Lidchi V, Winchester B, Wraith JE. Long-term follow-up following bone marrow transplantation for Hunter disease. J Inherit Metab Dis. 1999 Jun;22(5):638-48. PubMed PMID: 10399096.	Abstract	Yes	Yes. Authors did not report efficacy of enzime replacement.
91	Harrison CN, Gale RE, Linch DC. Quantification of X-chromosome inactivation patterns using RT-PCR of the polymorphic iduronate-2-sulphatase gene and correlation of the results obtained with DNA-based techniques. Leukemia. 1998 Nov;12(11):1834-9. PubMed PMID: 9823962.	Abstract	Yes	Yes. They did not study a clinical model.
92	Gort L, Chabás A, Coll MJ. Hunter disease in the Spanish population: molecular analysis in 31 families. J Inherit Metab Dis. 1998 Aug;21(6):655-61. Review. PubMed PMID: 9762601.	Abstract	Yes	Yes. Authors did not report efficacy of enzime replacement.
93	Gal A, Beck M, Sewell AC, Morris CP, Schwinger E, Hopwood JJ. Gene diagnosis and carrier detection in Hunter syndrome by the iduronate-2-sulphatase cDNA probe. J Inherit Metab Dis. 1992;15(3):342-6. PubMed PMID: 1357230.	Abstract	Yes	Yes. Authors did not report efficacy of enzime replacement.
94	Wraith JE, Cooper A, Thornley M, Wilson PJ, Nelson PV, Morris CP, Hopwood JJ. The clinical phenotype of two patients with a complete deletion of the iduronate-2-sulphatase gene (mucopolysaccharidosis II--Hunter syndrome). Hum Genet. 1991 Jun;87(2):205-6. PubMed PMID: 1906048.	Abstract	Yes	Yes. Authors did not report efficacy of enzime replacement.
95	Dean MF, Stevens RL, Muir H, Benson PF, Button LR, Anderson RL, Boylston A, Mowbray J. Enzyme replacement therapy by fibroblast transplantation: long-term biochemical study in three cases of Hunter's syndrome. J Clin Invest. 1979 Jan;63(1):138-46. PubMed PMID: 105013; PubMed Central PMCID: PMC371928.	Article	Yes	Yes. Authors did not report efficacy of enzime replacement.
96	Dean MF, Muir H, Benson PF, Button LR, Boylston A, Mowbray J. Enzyme replacement therapy by fibroblast transplantation in a case of Hunter syndrome. Nature. 1976 May 27;261(5558):323-5. PubMed PMID: 818571.	Abstract	Yes	Yes. Authors did not report efficacy of enzime replacement.
97	Westhoff M, Litterst P. Successful Noninvasive Ventilation and Enzyme Replacement Therapy in an Adult Patient with Morbus Hunter. JIMD Repv.5; 2012. JIMD Rep. 2012; 5: 77–82. Published online 2011 Dec 16. doi: 10.1007/8904_2011_100 PMCID: PMC3509906	Article	No
98	Chakraborty PP1, Patra S1, Biswas SN1, Barman H1. Attenuated form of type II mucopolysaccharidoses (Hunter syndrome): pitfalls and potential clues in diagnosis. BMJ Case Rep. 2018 Feb 23;2018. pii: bcr-2018-224392. doi: 10.1136/bcr-2018-224392. PMID: 29478001 DOI: 10.1136/bcr-2018-224392	Article	Yes	Yes. Authors did not report efficacy of enzime replacement.
99	A case of mucopolysaccharidosis (MPS) II diagnosed from the appearance of optic nerve head swelling. Akiyama R., Murakami Y., Sengoku A., Sonoda K.-H. Neuro-Ophthalmology Japan (2018) 35:1 (59-63). Date of Publication: 2018	Abstract	No
100	Barth AL1, de Magalhães TSPC1, Reis ABR1, de Oliveira ML2, Scalco FB2, Cavalcanti NC1, Silva DSE1, Torres DA1, Costa AAP1, Bonfim C3, Giugliani R4, Llerena JC Jr1, Horovitz DDG1. Early hematopoietic stem cell transplantation in a patient with severe mucopolysaccharidosis II: A 7 years follow-up. Mol Genet Metab Rep. 2017 Jun 8;12:62-68. doi: 10.1016/j.ymgmr.2017.05.010. eCollection 2017 Sep. PMID…	Article	No
101	Ariani Y. Priambodo R. Hafifah C.N. Sjarif D.R. A novel variant c.1506G>C at exon 9 of iduronate 2-sulfatase gene in mucopolysaccharidosis type II Indonesian child. Annals of Translational Medicine (2017) 5 Supplement 2. Date of Publication: 1 Sep 2017. 12th Asia-Pacific Conference on Human Genetics 2017, DOI 10.21037/atm.2017.s092 FULL TEXT LINK http://dx.doi.org/10.21037/atm.2017.s092	Article	Yes	Yes. Authors did not report efficacy of enzime replacement.
102	Matsubara Y. Miyazaki O. Nosaka S. Kosuga M. Okuyama T. Awai K. Changes of brain magnetic resonance imaging in patients with mucopolysaccharidoses under enzyme replacement therapy. Pediatric Radiology (2017) 47 Supplement 1 (S243). Date of Publication: 1 May 2017 CONFERENCE NAME 60th Annual Meeting of the Society for Pediatric Radiology, SPR 2017 DOI: 10.1007/s00247-017-3809-x	Abstract	Yes	Yes. The results are aggregated. They did not narrate individual cases.
103	Jarstad A., Meeker A., Ko M. Ophthalmic findings in a hunter syndrome patient on enzyme replacement therapy. Neurology (2017) 88:16 Supplement 1. Date of Publication: 1 Apr 2017	Abstract	No
104	Vega M.R.R., Vidaña H.G., Cuéllar G.P., Cuevas-Covarrubias S.A. A case report of a patient with mucopolysaccharidosis type II. Reporte de caso de paciente con mucopolisacaridosis tipo II. Revista Medica del Hospital General de Mexico (2017) 80:2 (97-100). Date of Publication: 1 Apr 2017	Article	Yes	Yes. Authors did not report efficacy of enzime replacement.
105	Grodecká L., Kováčová T., Kramárek M., Seneca S., Stouffs K., De Laet C., Majer F., Kršjaková T., Hujová P., Hrnčířová K., Souček P., Lissens W., Buratti E., Freiberger T. Detailed molecular characterization of a novel IDS exonic mutation associated with multiple pseudoexon activation. Journal of Molecular Medicine (2017) 95:3 (299-309). Date of Publication: 1 Mar 2017	Abstract	Yes	Yes. Authors did not report efficacy of enzime replacement.
106	Li Y., Mei S., Kong X., Zhao Z., Zhu X., Yang X., Qin Z., Wu H. Analysis of IDS gene mutation in a family affected with mucopolysaccharidosis type II. Chinese Journal of Medical Genetics (2017) 34:1 (58-60). Date of Publication: 1 Feb 2017	Abstract	Yes	Yes. Authors did not report efficacy of enzime replacement.
107	Chiong M.A.D., Canson D.M., Abacan M.A.R., Baluyot M.M.P., Cordero C.P., Silao C.L.T. Clinical, biochemical and molecular characteristics of Filipino patients with mucopolysaccharidosis type II - Hunter syndrome. Orphanet Journal of Rare Diseases (2017) 12:1 Article Number: 7. Date of Publication: 11 Jan 2017	Article	Yes	Yes. The results are aggregated. They did not narrate individual cases.
108	Moreno L.J., Sanchez A., Satizábal J.M. Short term impact from enzyme replacement therapy on patients with attenuated Hunter syndrome (MPS II) showing complex heart disease. Molecular Genetics and Metabolism (2017) 120:1-2 (S99). Date of Publication: 1 Jan 2017	Abstract	No
109	Hamada Y., Shibuya T., Yamamoto K., Kondo H., Irahara K., Otomo T., Sakai N., Ozono K. Enzyme replacement therapy ameliorated growth impairment of Mucopolysaccharidosis type II patients. International Journal of Pediatric Endocrinology (2017) 2017 Supplement 1. Date of Publication: 2017	Abstract	Yes	Yes. The results are aggregated. They did not narrate individual cases.
110	Lewis S., Shapiro E., Whitley C., Delaney K., Eisengart J. Neurocognitive profiles of untreated Hunter syndrome. Molecular Genetics and Metabolism (2017) 120:1-2 (S83). Date of Publication: 1 Jan 2017	Abstract	Yes	Yes. The results are aggregated. They did not narrate individual cases.
111	Wang H., Wierenga K. Diagnosis, management and follow up of mucopolysaccharidosis: A five year review from a single mid-level institute. Molecular Genetics and Metabolism (2017) 120:1-2 (S136-S137). Date of Publication: 1 Jan 2017	Abstract	Yes	Yes. The results are aggregated. They did not narrate individual cases.
112	Varga E., Nemes C., Bock I., Varga N., Fehér A., Dinnyés A., Kobolák J. Generation of Mucopolysaccharidosis type II (MPS II) human induced pluripotent stem cell (iPSC) line from a 1-year-old male with pathogenic IDS mutation. Stem Cell Research (2016) 17:3 (482-484). Date of Publication: 1 Nov 2016	Abstract	Yes	Yes. Authors did not report efficacy of enzime replacement.
113	Bettocchi I., Ortolano R., Baronio F., Bertola F., Pession A., Cassio A. An atypical patient with Hunter syndrome. Journal of Inherited Metabolic Disease (2016) 39 Supplement 1 (S266). Date of Publication: 1 Sep 2016	Abstract	No
114	Hadipour F., Rolf A., Shafeghati Y., Verheijen F.W., Hadipour Z. Mucopolysaccharidosis type 2: Information on 19 Hunter syndrome patients in Iran. Journal of Inherited Metabolic Disease (2016) 39 Supplement 1 (S180). Date of Publication: 1 Sep 2016	Abstract	Yes	Yes. The results are aggregated. They did not narrate individual cases.
115	Kiykim E., Zubarioglu T., Cansever M.S., Aktuglu Zeybek A.C. De novo mutation in a patient with attenuated form of MPS type II. Journal of Inherited Metabolic Disease (2016) 39 Supplement 1 (S267). Date of Publication: 1 Sep 2016	Abstract	Yes	Yes. Authors did not report efficacy of enzime replacement.
116	Magner M., Asfaw B., Kulhanek J., Poupetova H., Langer J., Zeman J., Svandova I. Increase of serum levels of matrix metalloproteinase-2 in four paediatric MPS II patients. Journal of Inherited Metabolic Disease (2016) 39 Supplement 1 (S187). Date of Publication: 1 Sep 2016	Abstract	Yes	Yes. Authors did not report efficacy of enzime replacement.
117	Parini R., Spada M., Gasperini S., Galimberti C., Bertola F., Biamino E., Pasetti M., Nichelli F., Biondi A., Rovelli A. Outcome of haematopoietic stem cell transplantation in two mucopolysaccharidosis type II severe patients. Journal of Inherited Metabolic Disease (2016) 39 Supplement 1 (S188). Date of Publication: 1 Sep 2016	Abstract	Yes	Yes. Authors did not report efficacy of enzime replacement.
118	Stewart F.J., Bentley A., Burton B.K., Guffon N., Hale S.L., Harmatz P.R., Kircher S.G., Kochhar P.K., Mitchell J.J., Plöckinger U., Graham S., Sande S., Sisic Z., Johnston T.A. Pregnancy in patients with mucopolysaccharidosis: A case series. Molecular Genetics and Metabolism Reports (2016) 8 (111-115). Date of Publication: 1 Sep 2016	Abstract	Yes	Yes. Authors did not report efficacy of enzime replacement.
119	Ribas G.S., Jacques C., Donida B., Marchetti D., Deon M., Mescka C., Giugliani R., Vargas C.R. Nitrosative stress and protein damage in Mucopolysaccharidosis type II patients is correlated with dermatan sulphate. Journal of Inherited Metabolic Disease (2016) 39 Supplement 1 (S179). Date of Publication: 1 Sep 2016	Abstract	Yes	Yes. Authors did not report efficacy of enzime replacement.
120	Romero F.H.C., Martinez J.I.N., Barragan D.E.C., Escobar I.G. Severe adverse reaction to idursulfase in 3 Mexican brothers with MPS-II: Case series. Allergy: European Journal of Allergy and Clinical Immunology (2016) 71 Supplement 102 (526-527). Date of Publication: 1 Aug 2016	Abstract	No
121	Lin H.-Y., Chuang C.-K., Chiu H.-C., Lin S.-P. Mucopolysaccharidosis Type II—An Unexpected “3 in 1” Family. Pediatrics and Neonatology (2016) 57:4 (359-360). Date of Publication: 1 Aug 2016	Article	Yes	Yes. Authors did not report efficacy of enzime replacement.
122	Mimouni-Bloch A., Finezilber Y., Rothschild M., Raas-Rothschild A. Extensive Mongolian Spots and Lysosomal Storage Diseases. Journal of Pediatrics (2016) 170 (333-333e1). Date of Publication: 1 Mar 2016	Article	Yes	Yes. Authors did not report efficacy of enzime replacement.
123	Chung W.S., Oh C.H., Kim Y.H., Ko Y.K. Anesthetic management using an i-gel™ supraglottic airway for a pediatric patient with hunter syndrome-a case report. International Journal of Clinical and Experimental Medicine (2016) 9:2 (4843-4846). Date of Publication: 29 Feb 2016	Article	Yes	Yes. Authors did not report efficacy of enzime replacement.
124	Berry L., Bailey L., Burrow T.A., Wehmeyer C. Long term outcome of bone marrow transplantation for Hunter syndrome: A case report. Molecular Genetics and Metabolism (2016) 117:2 (S28). Date of Publication: February 2016	Article	Yes	Yes. Authors did not report efficacy of enzime replacement.
125	Alkhachroum A.M., Preston D.C. Ultrasound findings of carpal tunnel syndrome in a hunter syndrome patient. Muscle and Nerve (2016) 53:1 (147-150). Date of Publication: 1 Jan 2016	Abstract	Yes	Yes. Authors did not report efficacy of enzime replacement.
126	Lee K., Jun S.-H., Song S.H., Park H.-D., Park K.U., Song J. Direct assay of iduronate-2-sulfatase for Hunter disease using UPLC-tandem mass spectrometry and fluorogenic substrate. Clinical Biochemistry (2015) 48:18 (1350-1353). Date of Publication: 1 Dec 2015	Abstract	Yes	Yes. Authors did not report efficacy of enzime replacement.
127	Al-Sannaa N.A., Bay L., Barbouth D.S., Benhayoun Y., Goizet C., Guelbert N., Jones S.A., Kyosen S.O., Martins A.M., Phornphutkul C., Reig C., Pleat R., Fallet S., Ivanovska Holder I. Early treatment with laronidase improves clinical outcomes in patients with attenuated MPS I: A retrospective case series analysis of nine sibships. Orphanet Journal of Rare Diseases (2015) 10:1 Article Number: 131. …	Abstract	Yes	Yes. Authors did not include MPSII patients.
128	Sanchez J.I., Ascaso F.J., Perez I., Almenara C., Esteban O., Martinez M., Idoate A., Torralba M.A. Role of SD-OCT in the follow-up of a patient with macular edema associated with mucopoysaccharidosis type II (Hunter syndrome) undergoing idursulfase enzyme replacement therapy. Acta Ophthalmologica (2015) 93 Supplement 255. Date of Publication: 1 Oct 2015	Abstract	No
129	Gkavogiannakis N., Aggelides X., Makris M. Case of infusion reaction to idursulafase and successful re-administration with desensitization. Allergy: European Journal of Allergy and Clinical Immunology (2015) 70 SUPPL. 101 (547-548). Date of Publication: September 2015	Abstract	No
130	Rasheeedah I., Patrick O., Abdullateef A., Mohammed A., Sherifat K., Gbadebo I. Challenges in the Management of Mucopolysaccharidosis Type II (Hunter's Syndrome) in a Developing Country: a Case Report. Ethiopian journal of health sciences (2015) 25:3 (279-282). Date of Publication: 1 Jul 2015	Article	Yes	Yes. Authors did not report efficacy of enzime replacement.
131	Fischer A., Fernandez K., Flores J., Deshpande G., Croke B., Antony R. Autoimmune thrombocytopenia in a patient with hunter syndrome: Should iduronate-2-sulfatase replacement therapy still be considered? Pediatric Blood and Cancer (2015) 62 Supplement 2 (S61). Date of Publication: 1 Jun 2015	Abstract	No
132	Narayana K., Lau H., Nolan R., Rucker J., Balcer L., Galetta S. Attenuated hunter syndrome: A rare cause of simultaneous retinal and optic nerve disease. Neurology (2015) 84 SUPPL. 14. Date of Publication: 6 Apr 2015	Abstract	Yes	Yes. Authors did not report efficacy of enzime replacement.
133	Anekar J., Deepa Narayanan C., Raj A.C., Sandeepa N.C., Nappalli D. A Rare Case of Mucopolysaccharidosis: Hunter Syndrome. Journal of Clinical and Diagnostic Research (2015) 9:4 (ZD23-ZD26). Date of Publication: 1 Apr 2015	Abstract	Yes	Yes. Authors did not report efficacy of enzime replacement.
134	Lau H.A., Nolan R., Narayana K., Rucker J., Balcer L., Galetta S. Multiplemechanisms of ophthalmologic involvement in attenuated Hunter syndrome: A case report. Molecular Genetics and Metabolism (2015) 114:2 (S69). Date of Publication: February 2015	Abstract	No
135	Quong W.L., Kanani M., Elliott M.J. Aorto-tracheopexy in the treatment of hunter syndrome. Annals of Thoracic Surgery (2015) 99:6 (2190-2192). Date of Publication: 1 Jun 2015	Article	Yes	Yes. Authors did not report efficacy of enzime replacement.
136	Huillca-Huerta D.A., Yllescas-Estela L.G., Huerta-Medina E.A., San Martín-Howard P.E. Necrotizing pneumonia associated with influenza A H1N1 infection in a child with mucopolysaccharidosis type II. Case report Neumonía necrotizante asociada a infección por influenza A H1N1 en un niño con mucopolisacaridosis tipo II. Archivos Argentinos de Pediatria (2015) 113:1 (e1-e5). Date of Publication: 1 Jan…	Article	Yes	Yes. Authors did not report efficacy of enzime replacement.
137	Kinoshita M., Furujo M., Kubo T. EEG evaluation of mucopolysaccharidosis type II after enzyme replacement therapy. Clinical Neurology (2014) 54 Supplement 1 (S123). Date of Publication: 1 Sep 2014.	Abstract	No
138	Dvorakova L., Vlaskova H., Storkanova G., Reboun M., Vcelak J., Poupetova H., Bartl J., Mihalova R., Hruba E., Peskova K. Rare case of mucopolysaccharidosis type II in a female patient. Journal of Inherited Metabolic Disease (2014) 37:1 SUPPL. 1 (S134-S135). Date of Publication: September 2014	Abstract	Yes	Yes. Authors did not report efficacy of enzime replacement.
139	Cimbalistiene L., Songailiene J., Meskiene R., Ambrozaityte L. Attenuated form of Hunter's syndrome: A challenge to diagnose. Journal of Inherited Metabolic Disease (2014) 37:1 SUPPL. 1 (S135). Date of Publication: September 2014	Abstract	Yes	Yes. Authors did not report efficacy of enzime replacement.
140	Moreira A., Antunes M., Costa C., Dias J. Anaesthetic management of a patient with Hunter syndrome. European Journal of Anaesthesiology (2014) 31 SUPPL. 52 (127). Date of Publication: June 2014	Abstract	Yes	Yes. Authors did not report efficacy of enzime replacement.
141	Bivina L., Boyadjiev S.A. Mucopolysaccharidosis type II (MPS II): Case report of three affected siblings. Molecular Genetics and Metabolism (2014) 111:2 (S27). Date of Publication: February 2014	Abstract	No
142	Martínez-Quintana E., Rodríguez-González F. Mucopolysaccharidosis type II and the G374sp mutation. Molecular Syndromology (2014) 4:4 (203-206). Date of Publication: 2014	Article	Yes	Yes. Authors did not report efficacy of enzime replacement.
143	Lonardo F., Di Natale P., Lualdi S., Acquaviva F., Cuoco C., Scarano F., Maioli M., Pavone L.M., Di Gregorio G., Filocamo M., Scarano G. Mucopolysaccharidosis type II in a female patient with a reciprocal X;9 translocation and skewed X chromosome inactivation. American Journal of Medical Genetics, Part A (2014) 164:10 (2627-2632). Date of Publication: 2014	Article	Yes	Yes. Authors did not report efficacy of enzime replacement.
144	Kuptanon C., Pangkanon S. Review of mucopolysaccharidosis diseases at the Queen Sirikit National Institute of Child Health in the past 15 years. Journal of the Medical Association of Thailand (2014) 97 Supplement 6 (S142-S146). Date of Publication: 1 Jun 2014	Abstract	Yes	Yes. The results are aggregated. They did not narrate individual cases.
145	Leroux S., Muller J.-B., Boutaric E., Busnel A., Lemouel F., Andro-Garçon M., Neven B., Valayannopoulos V., Vinceslas C. Hurler syndrome: Early diagnosis and treatment Syndrome de Hurler : Diagnostic et prise en charge précoces. Archives de Pediatrie (2014) 21:5 (501-506). Date of Publication: May 2014	Article	Yes	Yes. Authors did not include MPSII patients.
146	Byers S.L., Ficicioglu C. Infant with cardiomyopathy: When to suspect inborn errors of metabolism? World Journal of Cardiology (2014) 6:11 (1149-1155). Date of Publication: 2014	Article	Yes	Yes. Authors did not report efficacy of enzime replacement.
147	Jin P., Hao J.-W., Chen K., Dong C.-S., Yang Y.-B., Mo Z.-H. A 3' splice site mutation of IDS gene in a Chinese family with mucopolysaccharidosis type II. Gene (2013) 528:2 (236-240). Date of Publication: 10 Oct 2013	Article	Yes	Yes. Authors did not report efficacy of enzime replacement.
148	Brusius-Facchin A.C., Abrahão L., Schwartz I.V.D., Lourenço C.M., Santos E.S., Zanetti A., Tomanin R., Scarpa M., Giugliani R., Leistner-Segal S. Extension of the molecular analysis to the promoter region of the iduronate 2-sulfatase gene reveals genomic alterations in mucopolysaccharidosis type II patients with normal coding sequence. Gene (2013) 526:2 (150-154). Date of Publication: 10 Sep 2013	Article	Yes	Yes. Authors did not report efficacy of enzime replacement.
149	Rayamajhi A., Pokharel P.J., Chapagain R., Rayamajhi A.K. Mucopolysaccharidosis type II with inguinal hernia. Journal of Nepal Health Research Council (2013) 11:25 (293-295). Date of Publication: 1 Sep 2013	Article	Yes	Yes. Authors did not report efficacy of enzime replacement.
150	Marshall L.S., Simon J., Wood T., Peng M., Owen R., Feldman G.S., Zaragoza M.V. Deletion Xq27.3q28 in female patient with global developmental delays and skewed X-inactivation. BMC Medical Genetics (2013) 14:1 Article Number: 49. Date of Publication: 1 May 2013	Article	Yes	Yes. Authors did not report efficacy of enzime replacement.
151	Piña-Aguilar R.E., Zaragoza-Arévalo G.R., Rau I., Gal A., Alcántara-Ortigoza M.A., López-Martínez M.S., Santillán-Hernández Y. Mucopolysaccharidosis type II in a female carrying a heterozygous stop mutation of the iduronate-2-sulfatase gene and showing a skewed X chromosome inactivation. European Journal of Medical Genetics (2013) 56:3 (159-162). Date of Publication: March 2013	Article	Yes	The patients analyzed were women.
152	Sen A. Optic canal narrowing in hunter syndrome (Mucopolysaccharidosis II). American Journal of Neuroradiology (2013) 34:3 (E34). Date of Publication: March 2013	Article	Yes	Yes. Authors did not report efficacy of enzime replacement.
153	Moirangthem S., Krishnan S.B.G., Surianarayanan U., Varman A. Hunter's syndrome: A case report. Indian Journal of Psychiatry (2013) 55 SUPPL.1 (S111). Date of Publication: January 2013	Abstract	Yes	Yes. Authors did not report efficacy of enzime replacement.
154	Nava E., Weber P., Gautschi M., Nuoffer J.-M., Grunt S. Botulinum toxin type A for the treatment of equinus deformity in patients with mucopolysaccharidosis type II. Journal of Child Neurology (2012) 27:12 (1611-1615). Date of Publication: December 2012.	Article	No
155	Tanaka A., Okuyama T., Suzuki Y., Sakai N., Takakura H., Sawada T., Tanaka T., Otomo T., Ohashi T., Ishige-Wada M., Yabe H., Ohura T., Suzuki N., Kato K., Adachi S., Kobayashi R., Mugishima H., Kato S. Long-term efficacy of hematopoietic stem cell transplantation on brain involvement in patients with mucopolysaccharidosis type II: A nationwide survey in Japan. Molecular Genetics and Metabolism (2…	Article	Yes	Yes. The results are aggregated. They did not narrate individual cases.
156	Bonanni P., Gubernale M., Martinez F., Randazzo G., Milantoni L., Martinuzzi A., Boniver C., Vecchi M., Scarpa M. Non-convulsive status epilepticus of frontal origin in mucopolysaccharidosis type II successfully treated with ethosuximide. Developmental Medicine and Child Neurology (2012) 54:10 (961-964). Date of Publication: October 2012	Article	No
157	Li X.-Y., Shi X.-Y., Ju J., Hu X.-H., Yang X.-F., Zou L.-P. A novel iduronate 2-sulfatase mutation in a Chinese family with mucopolysaccharidosis type II. World Journal of Pediatrics (2012) 8:3 (281-283). Date of Publication: August 2012	Article	Yes	Yes. Authors did not report efficacy of enzime replacement.
158	Grinberg H., Quaio C.R.D.C., Avila M.S., Ferreira S.M.A., Vieira M.L.C., Benvenuti L.A., Kim C.A., Bocchi E.A. The first cardiac transplant experience in a patient with mucopolysaccharidosis. Cardiovascular Pathology (2012) 21:4 (358-360). Date of Publication: July-August 2012	Article	Yes	Yes. Authors did not report efficacy of enzime replacement.
159	Burruss D.M., Wood T.C., Espinoza L., Dwivedi A., Holden K.R. Severe hunter syndrome (mucopolysaccharidosis II) phenotype secondary to large deletion in the X chromosome encompassing IDS, FMR1, and AFF2 (FMR2). Journal of Child Neurology (2012) 27:6 (786-790). Date of Publication: June 2012	Article	Yes	Yes. Authors did not report efficacy of enzime replacement.
160	Brusius-Facchin A.C., De Souza C.F.M., Schwartz I.V.D., Riegel M., Melaragno M.I., Correia P., Moraes L.M., Llerena J., Giugliani R., Leistner-Segal S. Severe phenotype in MPS II patients associated with a large deletion including contiguous genes. American Journal of Medical Genetics, Part A (2012) 158 A:5 (1055-1059). Date of Publication: May 2012	Article	Yes	Yes. Authors did not report efficacy of enzime replacement.
161	Gucev Z.S., Tasic V. Idursulfatase therapy in mucopolysaccharidosis type II: After 2.5 years of treatment - No benefit for older patients with multisystem involvement. Pediatric Neurology (2012) 46:3 (199-200). Date of Publication: March 2012	Article	Yes	Yes. The results are aggregated. They did not narrate individual cases.
162	Uz B., Demiroglu H., Ozcebe O.I. Hunter syndrome and new onset idiopathic thrombocytopenic purpura in a young patient. Annals of Hematology (2012) 91:2 (303-304). Date of Publication: February 2012	Article	No
163	Yosunkaya E., Karaca E., Yilmaz S.B., Gezdirici A., Guven G., Seven M., Yuksel A. Sudden vision loss in a mucopolysaccharidosis I patient receiving enzyme replacement therapy. Genetic Counseling (2011) 22:4 (371-376). Date of Publication: 2011	Article	Yes	Yes. Authors did not include MPSII patients.
164	Pereira E.C., Sacomani D.G., da Motta A.A.P. Clinical manifestations in severe mucopolysaccharidosis type II: A case report Manifestações clínicas na mucopolissacaridose do tipo II grave: Relato de caso. Revista Neurociencias (2011) 19:4 (675-680). Date of Publication: 2011	Article	Yes	Yes. Authors did not report efficacy of enzime replacement.
165	Wei X., Jin F., Ye Y., Xu C., Qu N., Ju X., Yi X. A novel mutation of IDS gene in a Chinese patient with mucopolysaccharidosis II by next-generation sequencing. Clinica Chimica Acta (2011) 412:23-24 (2340-2342). Date of Publication: 20 Nov 2011	Article	Yes	Yes. Authors did not report efficacy of enzime replacement.
166	Zhang X.-S., Zhang H.-W., Gu X.-F. Prenatal diagnosis of mucopolysaccharidosis type II. Chinese Journal of Medical Genetics (2011) 28:5 (536-538). Date of Publication: 10 Oct 2011	Abstract	Yes	Yes. Authors did not report efficacy of enzime replacement.
167	Chkioua L., Khedhiri S., Ferchichi S., Tcheng R., Chahed H., Froissart R., Vianey-Saban C., Laradi S., Miled A. Molecular analysis of iduronate -2- sulfatase gene in Tunisian patients with mucopolysaccharidosis type II. Diagnostic pathology (2011) 6 (42). Date of Publication: 2011	Article	Yes	Yes. Authors did not report efficacy of enzime replacement.
168	Alegra T., Eizerik D., Cerqueira C.C.S., Pereira T.V., Schwartz I.V.D. A systematic literature review: Enzyme replacement therapy in mucopolysaccharidosis type II. Journal of Inherited Metabolic Disease (2011) 34 SUPPL. 3 (S230). Date of Publication: August 2011	Article	Yes	Yes. Authors did not report efficacy of enzime replacement. Es el 27
169	Oshima J., Lee J.A., Breman A.M., Fernandes P.H., Babovic-Vuksanovic D., Ward P.A., Wolfe L.A., Eng C.M., Del Gaudio D. LCR-initiated rearrangements at the IDS locus, completed with Alu-mediated recombination or non-homologous end joining. Journal of Human Genetics (2011) 56:7 (516-523). Date of Publication: July 2011	Article	Yes	Yes. Authors did not report efficacy of enzime replacement.
170	Baldo G., Matte U., Artigalas O., Schwartz I.V., Burin M.G., Ribeiro E., Horovitz D., Magalhaes T.P., Elleder M., Giugliani R. Placenta analysis of prenatally diagnosed patients reveals early GAG storage in mucopolysaccharidoses II and VI. Molecular Genetics and Metabolism (2011) 103:2 (197-198). Date of Publication: June 2011	Article	Yes	Yes. Authors did not report efficacy of enzime replacement.
171	Holt J.B., Poe M.D., Escolar M.L. Natural progression of neurological disease in mucopolysaccharidosis type II. Pediatrics (2011) 127:5 (e1258-e1265). Date of Publication: May 2011	Article	Yes	Yes. The results are aggregated. They did not narrate individual cases.
172	Diethelm-Okita B., Whitley C. Evaluation of surgical outcomes in MPS patients with cervical cord compression-A case study. Molecular Genetics and Metabolism (2011) 102:2 (S15). Date of Publication: February 2011	Abstract	Yes	Yes. Authors did not include MPSII patients.
173	Sohn Y.B., Kim S.J., Park S.W., Park H.-D., Ki C.-S., Kim C.H., Huh S.W., Yeau S., Paik K.-H., Jin D.-K. A mother and daughter with the p.R443X mutation of mucopolysaccharidosis type II: Genotype and phenotype analysis. American Journal of Medical Genetics, Part A (2010) 152 A:12 (3129-3132). Date of Publication: December 2010	Article	Yes	Yes. Authors did not report efficacy of enzime replacement.
174	Anzar J., Sjarif D.R., Tanjung C. Growth & development impairment in A child with hunter syndrome: When is the right time to give enzyme replacement? Journal of Inherited Metabolic Disease (2010) 33 SUPPL. 1 (S137). Date of Publication: August 2010	Abstract	Yes	Yes. Authors did not report efficacy of enzime replacement.
175	Wold S.M., Derkay C.S., Darrow D.H., Proud V. Role of the pediatric otolaryngologist in diagnosis and management of children with mucopolysaccharidoses. International Journal of Pediatric Otorhinolaryngology (2010) 74:1 (27-31). Date of Publication: January 2010	Article	Yes	Yes. Authors did not report efficacy of enzime replacement.
176	Araya K., Sakai N., Mohri I., Kagitani-Shimono K., Okinaga T., Hashii Y., Ohta H., Nakamichi I., Aozasa K., Taniike M., Ozono K. Localized donor cells in brain of a Hunter disease patient after cord blood stem cell transplantation. Molecular Genetics and Metabolism (2009) 98:3 (255-263). Date of Publication: November 2009	Article	Yes	Yes. Authors did not report efficacy of enzime replacement.
177	Suzuki Y., Aoyama A., Kato T., Shimozawa N., Orii T. Retinitis pigmentosa and mucopolysaccharidosis type II: An extremely attenuated phenotype. Journal of Inherited Metabolic Disease (2009) 32:4 (582-583). Date of Publication: 2009	Article	Yes	Yes. Authors did not report efficacy of enzime replacement.
178	Clarke J., Bell C., Coyle D., Stevenson H., Evans G., Martin M.J., Sabharwal M., Gadhok A., Winquist E. A policy francemework for funding drugs for rare diseases. Value in Health (2009) 12:7 (A243). Date of Publication: October 2009	Article	Yes	Yes. It is a review without individual data.
179	Burton B.K., Paras A. Cerebral and myocardial infarction in patients with hunter syndrome (MPS II): Case report and data from the hunter outcome survey (HOS). Molecular Genetics and Metabolism (2009) 98:1-2 (71). Date of Publication: September-October 2009.	Abstract	Yes	Yes. It is a review without individual data.
180	Artigalás O.A., Da Silva L.R., Burin M., Pastores G.M., Zeng B., MacEdo N., Schwartz I.V.D. Multiple sulfatase deficiency: Clinical report and description of two novel mutations in a Brazilian patient. Metabolic Brain Disease (2009) 24:3 (493-500). Date of Publication: September 2009.	Article	Yes	Yes. Authors did not include MPSII patients.
181	Farooq M.U., Balmer S.V., DeRoos S.T., Houtman K.L., Chillag K.L. A novel mutation in the iduronate 2 sulfatase gene resulting in mucopolysaccharidosis type II and chorea: Care report of two siblings. Movement Disorders (2008) 23:10 (1487-1488). Date of Publication: 30 Jul 2008	Article	No
182	Bajaj N., Joshi P., Bajaj S.K. Hunter disease: A case report. Journal of Nepal Paediatric Society (2008) 28:2 (62-65). Date of Publication: July/December 2008	Abstract	Yes	Yes. Authors did not report efficacy of enzime replacement.
183	Lau K.-C., Lam C.-W. Molecular investigations of a novel iduronate-2-sulfatase mutant in a Chinese patient. Clinica Chimica Acta (2008) 392:1-2 (8-10). Date of Publication: June 2008	Article	Yes	Yes. Authors did not report efficacy of enzime replacement.
184	Mutesa L., Muganga N., Lissens W., Boemer F., Schoos R., Pierquin G., Bours V. Molecular analysis in two siblings African patients with severe form of hunter syndrome: Identification of a novel (p.Y54X) nonsense mutation Journal of Tropical Pediatrics (2007) 53:6 (434-437). Date of Publication: December 2007	Article	Yes	Yes. Authors did not report efficacy of enzime replacement.
185	Guo Y.B., Pan J.X., Meng Y.X. A new mutation (1062 del 16) of iduronate-2-sulfatase gene from a Chinese patient with Hunter syndrome. Journal of Zhejiang University. Science. B. (2007) 8:8 (566-569). Date of Publication: Aug 2007	Article	Yes	Yes. Authors did not report efficacy of enzime replacement.
186	Probst F.J., Roeder E.R., Enciso V.B., Ou Z., Cooper M.L., Eng P., Li J., Gu Y., Stratton R.F., Chinault A.C., Shaw C.A., Sutton V.R., Sau W.C., Nelson D.L. Chromosomal microarray analysis (CMA) detects a large X chromosome deletion including FMR1, FMR2, and IDS in a female patient with mental retardation. American Journal of Medical Genetics, Part A (2007) 143:12 (1358-1365). Date of Publication…	Article	Yes	Yes. Authors did not report efficacy of enzime replacement.
187	Chen C.-P., Lin S.-P., Tzen C.-Y., Hwu W.-L., Chern S.-R., Chuang C.-K., Chiang S.-S., Wang W. Prenatal diagnosis and genetic counseling of mucopolysaccharidosis type II (Hunter syndrome). Genetic Counseling (2007) 18:1 (49-56). Date of Publication: 2007	Abstract	Yes	Yes. Authors did not report efficacy of enzime replacement.
188	Schwartz I.V.D., Lima L.C., Tylee K., Oliveira Sobrinho R.P., Norato D.Y.J., Duarte A.R., Besley G., Burin M.G., Matte U., Giugliani R., Leistner-Segal S. Further cases of "neighbor" mutations in mucopolysaccharidosis type II. American Journal of Medical Genetics, Part A (2006) 140:15 (1684-1686). Date of Publication: 1 Aug 2006	Article	Yes	Yes. Authors did not report efficacy of enzime replacement.
189	Fuller M., Chau A., Nowak R.C., Hopwood J.J., Meikle P.J. A defect in exodegradative pathways provides insight into endodegradation of heparan and dermatan sulfates. Glycobiology (2006) 16:4 (318-325). Date of Publication: April 2006	Article	Yes	Yes. Authors did not report efficacy of enzime replacement.
190	Guo Y.B., Du C.S. Zhonghua er ke za zhi. Detection of a new mutation (1343-TT) in the iduronate-2-sulfatase gene from a Chinese patient with mucopolysaccharidosis type II. Chinese journal of pediatrics (2006) 44:2 (110-113). Date of Publication: Feb 2006	Abstract	Yes	Yes. Authors did not report efficacy of enzime replacement.
191	Chou Y.-Y., Chao S.-C., Kuo P.-L., Lin S.-J. A 38.8 kb deletion mutation of the iduronate-2-sulfatase gene in a patient with Hunter syndrome. Journal of the Formosan Medical Association (2005) 104:4 (273-275). Date of Publication: 2005	Abstract	Yes	Yes. Authors did not report efficacy of enzime replacement.
192	Tuschl K., Gal A., Paschke E., Kircher S., Bodamer O.A. Mucopolysaccharidosis type II in females: Case report and review of literature. Pediatric Neurology (2005) 32:4 (270-272). Date of Publication: April 2005	Abstract	Yes	Yes. Authors did not report efficacy of enzime replacement.
193	Joly H., Dauphin C., Motreff P., De Riberolles C., Lusson J.R. Double aortic and mitral valve replacement in an 18 year old patient with Hunter's disease Double remplacement valvulaire aortique et mitral chez un patient de 18 ans atteint d'une maladie de Hunter. Archives des Maladies du Coeur et des Vaisseaux (2004) 97:5 (561-563). Date of Publication: May 2004	Abstract	Yes	Yes. Authors did not report efficacy of enzime replacement.
194	Pérez-Pastor G., Larrea M., Lloret A., Febrer I., Fortea J.M. Cutaneous manifestations of Hunter syndrome Manifestaciones cutáneas del síndrome de Hunter. Actas Dermo-Sifiliograficas (2004) 95:2 (129-132). Date of Publication: Mar 2004	Abstract	Yes	Yes. Authors did not report efficacy of enzime replacement.
195	Ricci V., Filocamo M., Regis S., Corsolini F., Stroppiano M., Di Duca M., Gatti R. Expression studies of two novel in CIS-mutations identified in an intermediate case of Hunter syndrome. American Journal of Medical Genetics (2003) 120 A:1 (84-87). Date of Publication: 1 Jul 2003	Abstract	Yes	Yes. Authors did not report efficacy of enzime replacement.
196	136. An Alu-mediated rearrangement as cause of exon skipping in Hunter disease. Ricci V., Regis S., Di Duca M., Filocamo M. Human Genetics (2003) 112:4 (419-425). Date of Publication: April 2003	Abstract	Yes	Yes. Authors did not report efficacy of enzime replacement.
197	137. Hunter's disease: Clinical review and update Enfermedad de hunter: Revisión clínica y actualización Gonzalez Gutierrez-Solana L., Gascón Jiménez F.J., García Peñas J.J., Ruiz-Falcó Rojas M.L., Madero López L., Coll Rosell M.J., Chabás Bergón A. Revista Espanola de Pediatria (2002) 58:347 (346-355). Date of Publication: Sep 2002	Abstract	Yes	Yes. Authors did not report efficacy of enzime replacement.
198	138. Mitral valve prolapse and type II mucopolysaccharidosis: Two familial cases Prolapsus mitral et mucopolysaccharidose type II observation de deux cas familiaux Sonino V., Sekarski N., Matthieu J.-M., Payot M. Archives des Maladies du Coeur et des Vaisseaux (2001) 94:5 (518-522). Date of Publication: 2001	Abstract	Yes	Yes. Authors did not report efficacy of enzime replacement.
199	Bonuccelli G., Di Natale P., Corsolini F., Villani G., Regis S., Filocamo M. The effect of four mutations on the expression of iduronate-2-sulfatase in mucopolysaccharidosis type II. Biochimica et Biophysica Acta - Molecular Basis of Disease (2001) 1537:3 (233-238). Date of Publication: 29 Nov 2001	Abstract	Yes	Yes. Authors did not report efficacy of enzime replacement.
200	Michel J.L., Gebska E., Schmitt D., Cambazard F. Characteristic biscapular papulosis in hunter's disease Papulose de surcharge biscapulaire caractéristique de la maladie de hunter. Nouvelles Dermatologiques (2000) 19:5 (404-407). Date of Publication: 2000	Abstract	Yes	Yes. Authors did not report efficacy of enzime replacement.
201	Cudry S., Tigaud I., Froissart R., Bonnet V., Maire I., Bozon D. MPS II in females: molecular basis of two different cases. Journal of medical genetics (2000) 37:10 (E29). Date of Publication: Oct 2000	Abstract	Yes	Yes. Authors did not report efficacy of enzime replacement.
202	Mullen C.A., Thompson J.N., Richard L.A., Chan K.W. Unrelated umbilical cord blood transplantation in infancy for mucopolysaccharidosis type IIB (Hunter syndrome) complicated by autoimmune hemolytic anemia. Bone Marrow Transplantation (2000) 25:10 (1093-1099). Date of Publication: 2000	Abstract	Yes	Yes. Authors did not report efficacy of enzime replacement.
203	Lagerstedt K., Carlberg B.-M., Karimi-Nejad R., Kleijer W.J., Bondeson M.-L. Analysis of a 43.6 kb deletion in a patient with Hunter syndrome (MPSII): Identification of a fusion transcript including sequences from the gene W and the IDS gene. Human Mutation (2000) 15:4 (324-331). Date of Publication: 2000	Abstract	Yes	Yes. Authors did not report efficacy of enzime replacement.
204	Karsten S., Voskoboeva E., Krasnopolskaja X., Bondeson M.-L. Novel type of genetic rearrangement in the iduronate-2-sulfatase (IDS) gene involving deletion, duplications, and inversions. Human Mutation (1999) 14:6 (471-476). Date of Publication: 1999	Abstract	Yes	Yes. Authors did not report efficacy of enzime replacement.
205	Gort L., Chabás A., Coll M.J. A new polymorphism in the iduronate-2-sulphatase gene. Implications for the diagnosis of Hunter disease. Journal of Inherited Metabolic Disease (1999) 22:7 (844). Date of Publication: 1999	Abstract	Yes	Yes. Authors did not report efficacy of enzime replacement.
206	Demitsu T., Kakurait M., Okubo Y., Shibayama C., Kikuchi Y., Mori Y., Sukegawa K., Mizuguchi M. Skin eruption as the presenting sign of Hunter syndrome IIB. Clinical and Experimental Dermatology (1999) 24:3 (179-182). Date of Publication: 1999	Abstract	Yes	Yes. Authors did not report efficacy of enzime replacement.
207	Coppa G.V., Gabrielli O., Cordiali R., Villani G.R.D., Di Natale P. Bone marrow transplantation in a Hunter patient with P266H mutation. International Journal of Molecular Medicine (1999) 4:4 (433-436). Date of Publication: 1 Oct 1999	Abstract	Yes	Yes. Authors did not report efficacy of enzime replacement.
208	Sapadin A.N., Friedman I.S. Extensive Mongolian spots associated with Hunter syndrome. Journal of the American Academy of Dermatology (1998) 39:6 (1013-1015). Date of Publication: 1998	Abstract	Yes	Yes. Authors did not report efficacy of enzime replacement.
209	Timms K.M., Edwards F.J., Belmont J.W., Yates J.R.W., Gibbs R.A. Reassessment of biochemically determined Hunter syndrome carrier status by DNA testing. Journal of Medical Genetics (1998) 35:8 (646-649). Date of Publication: 1998	Abstract	Yes	Yes. Authors did not report efficacy of enzime replacement.
210	Yoskovitch A., Tewfik T.L., Brouillette R.T., Schloss M.D., Der Kaloustian V.M. Acute airway obstruction in Hunter syndrome. International Journal of Pediatric Otorhinolaryngology (1998) 44:3 (273-278). Date of Publication: 10 Aug 1998	Abstract	Yes	Yes. Authors did not report efficacy of enzime replacement.
211	Bonuccelli G., Regis S., Filocamo M., Corsolini F., Caroli F., Gatti R. A deletion involving exons 2-4 in the iduronate-2-sulfatase gene of a patient with intermediate Hunter syndrome. Clinical Genetics (1998) 53:6 (474-477). Date of Publication: June 1998	Abstract	Yes	Yes. Authors did not report efficacy of enzime replacement.
212	Wilkerson M.J., Lewis D.C., Marks S.L., Prieur D.J. Clinical and morphologic features of mucopolysaccharidosis type II in a dog: naturally occurring model of Hunter syndrome. Veterinary pathology (1998) 35:3 (230-233). Date of Publication: May 1998	Abstract	Yes	Yes. They did not study a clinical model.
213	Timms K.M., Huckett L.E., Belmont J.W., Shapira S.K., Gibbs R.A. DNA deletion confined to the iduronate-2-sulfatase promoter abolishes IDS gene expression. Human Mutation (1998) 11:2 (121-126). Date of Publication: 1998	Abstract	Yes	Yes. Authors did not report efficacy of enzime replacement.
214	Sukegawa K., Matsuzaki T., Fukuda S., Masuno M., Fukao T., Kokuryu M., Iwata S., Tomatsu S., Orii T., Kondo N. Brother/sister siblings affected with Hunter disease: Evidence for skewed X chromosome inactivation. Clinical Genetics (1998) 53:2 (96-101). Date of Publication: February 1998	Abstract	Yes	Yes. Authors did not report efficacy of enzime replacement.
215	Sukegawa K., Song X.-Q., Masuno M., Fukao T., Shimozawa N., Fukuda S., Isogai K., Nishio H., Matsuo M., Tomatsu S., Kondo N., Orii T. Hunter disease in a girl caused by R468Q mutation in the iduronate-2-sulfatase gene and skewed inactivation of the X chromosome carrying the normal allele. Human Mutation (1997) 10:5 (361-367). Date of Publication: 1997	Abstract	Yes	Yes. Authors did not report efficacy of enzime replacement.
216	Karsten S.L., Lagerstedt K., Carlberg B.-M., Kleijer W.J., Zaremba J., Van Diggelen O.P., Czartoryska B., Pettersson U., Bondeson M.-L. Two distinct deletions in the IDS gene and the gene W: A novel type of mutation associated with the hunter syndrome. Genomics (1997) 43:2 (123-129). Date of Publication: 15 Jul 1997	Abstract	Yes	Yes. Authors did not report efficacy of enzime replacement.
217	Timms K.M., Bondeson M.-L., Ansari-Lari M.A., Lagerstedt K., Muzny D.M., Dugan-Rocha S.P., Nelson D.L., Pettersson U., Gibbs R.A. Molecular and phenotypic variation in patients with severe Hunter syndrome. Human Molecular Genetics (1997) 6:3 (479-486). Date of Publication: March 1997	Abstract	Yes	Yes. Authors did not report efficacy of enzime replacement.
218	Li P., Thompson J.N., Hug G., Huffman P., Chuck G. Biochemical and molecular analysis in a patient with the severe form of Hunter syndrome after bone marrow transplantation. American Journal of Medical Genetics (1996) 64:4 (531-535). Date of Publication: 1996	Abstract	Yes	Yes. Authors did not report efficacy of enzime replacement.
219	Birot A.-M., Bouton O., Froissart R., Maire I., Bozon D. IDS gene-pseudogene exchange responsible for an intragenic deletion in a Hunter patient. Human Mutation (1996) 8:1 (44-50). Date of Publication: 1996	Abstract	Yes	Yes. Authors did not report efficacy of enzime replacement.
220	Birot A.M., Delobel B., Gronnier P., Bonnet V., Maire I., Bozon D. A 5-megabase familial deletion removes the IDS and FMR-1 genes in a male hunter patient. Human Mutation (1996) 7:3 (266-268). Date of Publication: 1996	Abstract	Yes	Yes. Authors did not report efficacy of enzime replacement.
221	Whitley C.B., McIvor R.S., Aronovich E.L., Berry S.A., Blazar B.R., Burger S.R., Kersey J.H., King R.A., Faras A.J., Latchaw R.E., McCullough J., Pan D., Ramsay N.K.C., Stroncek D.F. Retroviral-mediated transfer of the iduronate-2-sulfatase gene into lymphocytes for treatment of mild Hunter syndrome (Mucopolysaccharidosis type II): Human gene therapy protocol. Human Gene Therapy (1996) 7:4 (537-5…	Abstract	Yes	Yes. Authors did not report efficacy of enzime replacement.
222	Aronovich E.L., Pan D., Whitley C.B. Molecular genetic defect underlying α-L-iduronidase pseudodeficiency. American Journal of Human Genetics (1996) 58:1 (75-85). Date of Publication: 1996	Abstract	Yes	Yes. Authors did not report efficacy of enzime replacement.
223	Sakai N., Saito T., Hayashi Y., Hiroi M. Prenatal diagnosis of Hunter syndrome in a carrier and her twin sisters. Acta Obstetrica et Gynaecologica Japonica (1996) 48:1 (65-68). Date of Publication: January 1996	Abstract	Yes	Yes. Authors did not report efficacy of enzime replacement.
224	Li P., Moore J.F., Thompson J.N. Novel use of limited primer extension in detecting mutations in human iduronate 2-sulfatase gene. Biochemistry and Molecular Biology International (1995) 35:6 (1299-1305). Date of Publication: 1995	Abstract	Yes	Yes. Authors did not report efficacy of enzime replacement.
225	Panine V.V., Hashimoto K. What syndrome is this? Pediatric Dermatology (1995) 12:4 (370-372). Date of Publication: 1995	Abstract	Yes	Yes. Authors did not report efficacy of enzime replacement.
226	Grosso M., Balzano N., Rippa E., Villani G.R.D., Salvatore F., Izzo P., Di Natale P. Molecular genetic characterization and prenatal diagnosis in a family with Hunter disease. Biochemistry and Molecular Biology International (1995) 35:6 (1261-1267). Date of Publication: 1995	Abstract	Yes	Yes. Authors did not report efficacy of enzime replacement.
227	Coppa G.V., Gabrielli O., Zampini L., Jetzequel A.M., Miniero R., Busca A., De Luca T., Di Natale P. Bone marrow transplantation in Hunter syndrome. Journal of Inherited Metabolic Disease (1995) 18:1 (91-92). Date of Publication: 1995	Abstract	Yes	Yes. Authors did not report efficacy of enzime replacement.
228	Li P., Huffman P., Thompson J.N. Mutations of the iduronate-2-sulfatase gene on a T146T background in three patients with Hunter syndrome. Human Mutation (1995) 5:3 (272-274). Date of Publication: 1995.	Abstract	Yes	Yes. Authors did not report efficacy of enzime replacement.
229	Bondeson M.-L., Dahl N., Malmgren H., Kleijer W.J., Tönnesen T., Carlberg B.-M., Pettersson U. Inversion of the IDS gene resulting from recombination with IDS-related sequences is a common cause of the Hunter syndrome. Human Molecular Genetics (1995) 4:4 (615-621). Date of Publication: April 1995	Abstract	Yes	Yes. Authors did not report efficacy of enzime replacement.
230	Bergstrom S.K., Quinn J.J., Greenstein R., Ascensao J. Long-term follow-up of a patient transplanted for Hunter's disease type IIB: A case report and literature review. Bone Marrow Transplantation (1994) 14:4 (653-658). Date of Publication: 1994	Abstract	Yes	Yes. Authors did not report efficacy of enzime replacement.
231	Whitley C.B., Anderson R.A., Aronovich E.L., Crotty P.L., Anyane-Yeboa K., Russo D., Warburton D. Caveat to genotype-phenotype correlation in mucopolysaccharidosis type II: Discordant clinical severity of R468W and R468Q mutations of the iduronate- 2-sulfatase gene. Human Mutation (1993) 2:3 (235-237). Date of Publication: 1993	Abstract	Yes	Yes. Authors did not report efficacy of enzime replacement.
232	Beck M., Steglich C., Zabel B., Dahl N., Schwinger E., Hopwood J.J., Gal A. Deletion of the Hunter gene and both DXS466 and DXS304 in a patient with mucopolysaccharidosis type II. American Journal of Medical Genetics (1992) 44:1 (100-103). Date of Publication: 1992	Abstract	Yes	Yes. Authors did not report efficacy of enzime replacement.
233	Cooper A., Thornley M., Wraith J.E. First-trimester diagnosis of Hunter syndrome: Very low iduronate sulphatase activity in chorionic villi from a heterozygous female fetus. Prenatal Diagnosis (1991) 11:9 (731-735). Date of Publication: 1991	Abstract	Yes	Yes. Authors did not report efficacy of enzime replacement.
234	Wilson P.J., Morris C.P., Anson D.S., Occhiodoro T., Bielicki J., Clements P.R., Hopwood J.J. Hunter syndrome: Isolation of an iduronate-2-sulfatase cDNA clone and analysis of patient DNA. Proceedings of the National Academy of Sciences of the United States of America (1990) 87:21 (8531-8535). Date of Publication: 1990	Abstract	Yes	Yes. Authors did not report efficacy of enzime replacement.
235	Clarke J.T.R., Willard H.F., Teshima I., Chang P.L., Skomorowski M.A. Hunter disease (mucopolysaccharidosis type II) in a karyotypically normal girl. Clinical Genetics (1990) 37:5 (355-362). Date of Publication: 1990	Abstract	Yes	Yes. Authors did not report efficacy of enzime replacement.
236	Lissens W., Van Lierde M., Decaluwe J., Foulon W., Evrard P., Van Hoof F., Freund M., Liebaers I. Prenatal diagnosis of Hunter syndrome using fetal plasma. Prenatal Diagnosis (1988) 8:1 (59-62). Date of Publication: 1988	Abstract	Yes	Yes. Authors did not report efficacy of enzime replacement.
237	Broadhead D.M., Kirk J.M., Burt A.J. Full expression of Hunter's disease in a female with an X-chromosome deletion leading to non-random inactivation. Clinical Genetics (1986) 30:5 (392-398). Date of Publication: 1986	Abstract	Yes	Yes. Authors did not report efficacy of enzime replacement.
238	Pannone N., Gatti R., Lombardo C., Di Natale P. Prenatal diagnosis of Hunter syndrome using chorionic villi. Prenatal Diagnosis (1986) 6:3 (207-210). Date of Publication: 1986	Abstract	Yes	Yes. Authors did not report efficacy of enzime replacement.
239	Archer I.M., Kingston H.M., Harper P.S. Prenatal diagnosis of Hunter syndrome. Prenatal Diagnosis (1984) 4:3 (195-200). Date of Publication: 1984	Abstract	Yes	Yes. Authors did not report efficacy of enzime replacement.
240	Kleijer W.J., Van Diggelen O.P., Janse H.C. First trimester diagnosis of Hunter syndrome on chorionic villi. Lancet (1984) 2:8400 (472). Date of Publication: 1984	Abstract	Yes	Yes. Authors did not report efficacy of enzime replacement.
241	Zlotogora J., Bach G. Hunter's syndrome: Activity of iduronate sulfate sulfatase in the serum of pregnant heterozygotes. New England Journal of Medicine (1984) 311:5 (331-332). Date of Publication: 1984	Abstract	Yes	Yes. Authors did not report efficacy of enzime replacement.
242	Lykkelund C., Søndergaard F., Therkelsen A.J., Tønnesen T., Rasmussen V., Mikkelsen M., Güttler F., Nyland M.H. Feasibility of first trimester prenatal diagnosis of Hunter syndrome. Lancet (1983) 2:8359 (1147). Date of Publication: 12 Nov 1983	Abstract	Yes	Yes. Authors did not report efficacy of enzime replacement.
243	Brown III F.R., Hall C.W., Neufeld E.F. Administration of iduronate sulfatase by plasma exchange to patients with the Hunter syndrome: A clinical study. American Journal of Medical Genetics (1982) 13:3 (309-318). Date of Publication: 1982	Abstract	Yes	Yes. Authors did not report efficacy of enzime replacement.
244	Wiesmann U.N., Spycher M.A., Meier C. Prenatal mucopolysaccharidosis II (Hunter): A pathogenetic study. Pediatric Research (1980) 14:5 (749-756). Date of Publication: 1980	Abstract	Yes	Yes. Authors did not report efficacy of enzime replacement.
245	Benson P.F., Button L.R., Fensom A.H., Dean M.F. Lumbar kyphosis in Hunter's disease (MPS II). Clinical Genetics (1979) 16:5 (317-322). Date of Publication: 1979	Abstract	Yes	Yes. Authors did not report efficacy of enzime replacement.
246	D'Auria N., D'Amore I., Di Iorio G., Annunziata P., Puoti S., Federico A. Hunter's disease: genetic, clinical and biochemical study of a new family Malattia di Hunter: studio genetico, clinico e biochimico di una nuova famiglia. Acta neurologica. Quaderni (1979) 39 (90-100). Date of Publication: 1979	Abstract	Yes	Yes. Authors did not report efficacy of enzime replacement.
247	Nwokoro N., Neufeld E.F. Detection of hunter heterozygotes by enzymatic analysis of hair roots. American Journal of Human Genetics (1979) 31:1 (42-49). Date of Publication: 1979	Abstract	Yes	Yes. Authors did not report efficacy of enzime replacement.
248	Yutaka T., Fluharty A.L., Stevens R.L., Kihara H. Iduronate sulfatase analysis of hair roots for identification of Hunter syndrome heterozygotes American Journal of Human Genetics (1978) 30:6 (575-582). Date of Publication: 1978	Abstract	Yes	Yes. Authors did not report efficacy of enzime replacement.
249	Suarez-Guerrero, Jorge Luis; Gómez Higuera, Pedro José Iván; Arias Flórez, Juan Sebastian; Contreras-García, Gustavo Adolfo. - Mucopolisacaridosis: características clínicas, diagnóstico y de manejo - Mucopolysaccharidosis: clinical features, diagnosis and management - Rev Chil Pediatr;87(4): 295-304, ago. 2016. ilus, tab	Abstract	Yes	Yes. It is a review without individual data.
250	Bicalho, Cibele Gomes; Rezende, Morena Morais; Nogueira, Ana Maria Carrilho Moinhos; Paulon, Roberta Melo Calvoso; Acosta, Angelina Xavier. - A importância da avaliação otorrinolaringológica de pacientes com mucopolissacaridose - The importance of the otorhinolaryngologic evaluation in mucopolysaccharidosis patients - Arq. int. otorrinolaringol. (Impr.);15(3): 290-294, jul.-set. 2011. ilus, graf,…	Abstract	Yes	Yes. Authors did not report efficacy of enzime replacement.
251	Luna, Paula Carolina; Abad, María Eugenia; Boggio, Paula; Moreno Figueredo, Alexander; Salgo, Marina; Schenone, Andrea; Amartino, Hernán; Politei, Juan Manuel; Serebrinski, Graciela; Hassan, Mercedes Lidia; Larralde, Margarita. - Enfermedades por depósito lisosomal: diagnóstico a partir de lesiones cutáneas - Lysosomal storage diseases, diagnosis from skin lesions - Dermatol. argent;17(3): 221-22…	Abstract	Yes	Yes. Authors did not report efficacy of enzime replacement.
252	Viana, Gustavo M; Lima, Nathália O. de; Cavaleiro, Rosely; Alves, Erik; Souza, Isabel C. N; Feio, Raimunda; Leistner-Segal, Sandra; Schwartz, Ida; Giugliani, Roberto; Silva, Luiz C. Santana da. - Mucopolysaccharidoses in northern Brazil: Targeted mutation screening and urinary glycosaminoglycan excretion in patients undergoing enzyme replacement therapy - Genet. mol. biol;34(3): 410-415, 2011. gr…	Article	Yes	Yes. The results are aggregated. They did not narrate individual cases. They narrate individual results.
253	Matos, Marcos Almeida; Barreto, Rosa; Penha, Carlos Eduardo; Soares, Claúdio; Costa, Angelina A. - Amplitude de movimentos em pacientes com mucopolissacaridose (mps-i, mps-ii e mps-vi), após um ano de terapia de reposição enzimática - Range of movement in patients with mucopolysaccharidosis (mps-i, mps- ii and mps-vi), after a year of enzyme replacement therapy - Amplitud de movimientos en pacien…	Abstract	Yes	Yes. The results are aggregated. They did not narrate individual cases.
254	Giugliani, Roberto;(…) Alcantara, Flavio F; Avilla, Silvio Gilberto A; Fagondes, Simone; Martins, Ana Maria. - Mucopolysaccharidosis I, II, and VI: brief review and guidelines for treatment - Genet. mol. biol;33(4): 589-604, 2010. graf, tab	Abstract	Yes	Yes. It is a review without individual data.
255	Giugliani, Roberto; (..), Flavio F; Avilla, Sylvio Gilberto A; Fagondes, Simone; Martins, Ana Maria. - Terapia de reposição enzimática para as mucopolissacaridoses I, II e VI: recomendações de um grupo de especialistas brasileiros - Enzyme replacement therapy for mucopolysaccharidoses I, II and VI: recommendations from a group of Brazilian F experts - Rev Assoc Med Bras;56(3): 271-277, 2010. tab	Abstract	Yes	Yes. It is a review without individual data.
256	Turra, Giovana S; Schwartz, Ida Vanessa D. - Avaliação da motricidade orofacial em pacientes com mucopolissacaridose: um estudo transversal - Evaluation of orofacial motricity in patients with mucopolysaccharidosis: a cross-sectional study - J Pediatr;85(3): 254-260, maio-jun. 2009. tab	Abstract	Yes	Yes. Authors did not report efficacy of enzime replacement.
257	El Dib, R. P; Pastores, G. M. - Laronidase for treating mucopolysaccharidosis type I - Genet Mol Res;6(3): 667-674, 2007. ilus, tab	Abstract	Yes	Yes. Authors did not include MPSII patients.
258	ID: CD008185 AU: da Silva Edina MK AU: Strufaldi Maria Wany Louzada AU: Andriolo Regis B AU: Silva Laercio A TI: Enzyme replacement therapy with idursulfase for mucopolysaccharidosis type II (Hunter syndrome) SO: Cochrane Database of Systematic Reviews YR: 2016 NO: 2 DOI: 10.1002/14651858.CD008185.pub4	Abstract	Yes	Yes. It is a review without individual data.
259	ID: CD009806 AU: Brunelli Marcela Junqueira AU: Atallah Álvaro N AU: da Silva Edina MK TI: Enzyme replacement therapy with galsulfase for mucopolysaccharidosis type VI SO: Cochrane Database of Systematic Reviews YR: 2016 NO: 3 DOI: 10.1002/14651858.CD009806.pub2	Abstract	Yes	Yes. Authors did not include MPSII patients.
260	ID: HTA-32009100120 AU: Pichon-Riviere A TI: Idursulfase for the treatment of Hunter syndrome (Structured abstract) SO: Health Technology Assessment Database YR: 2007 NO: 4 PB: Institute for Clinical Effectiveness and Health Policy (IECS)	Abstract	Yes	Yes. It is a technical database. They did not narrate individual cases.
261	ID: HTA-32016000639 AU: NIHR HSRIC TI: Intrathecal idursulfase (Elaprase) for Hunter syndrome (mucopolysaccharidosis type II) (Structured abstract) SO: Health Technology Assessment Database YR: 2016 NO: 4 PB: NIHR Horizon Scanning Research&Intelligence Centre	Abstract	Yes	Yes. It is a technical database. They did not narrate individual cases.
262	ID: HTA-32005000238 TI: Iduronate-2-sulfatase for Hunter Syndrome - horizon scanning review (Structured abstract) SO: Health Technology Assessment Database YR: 2005 NO: 4 PG: 6 PB: National Horizon Scanning Centre (NHSC)	Abstract	Yes	Yes. It is a technical database. They did not narrate individual cases.
263	ID: HTA-32012000454 TI: Idursulfase (Elaprase®) (Structured abstract) SO: Health Technology Assessment Database YR: 2007 NO: 4 PB: All Wales Therapeutics and Toxicology Centre (AWTTC), secretariat of the All Wales Medicines Strategy Group (AWMSG)	Abstract	Yes	Yes. It is a technical database. They did not narrate individual cases.
264	ID: HTA-32009100201 AU: Paladio N AU: Garcia O AU: Hereu P TI: Idursulfase (Elaprase) in the treatment of mucopolisacaridosis II (Structured abstract) SO: Health Technology Assessment Database YR: 2008 NO: 4 PB: Catalan Agency for Health Technology Assessment and Research (CAHTA)	Abstract	Yes	Yes. It is a technical database. They did not narrate individual cases.
265	ID: HTA-32010000727 TI: [Idursulfase (Elaprase) in the treatment of mucopolisacaridosis II (Structured abstract) SO: Health Technology Assessment Database YR: 2010 NO: 4 PB: Catalan Agency for Health Technology Assessment and Research (CAHTA)	Abstract	Yes	Yes. It is a technical database. They did not narrate individual cases.
266	ID: HTA-32011001513 TI: Enzyme replacement therapy for rare diseases: a review of clinical efficacy (Structured abstract) SO: Health Technology Assessment Database YR: 2011 NO: 4 PB: Canadian Agency for Drugs and Technologies in Health (CADTH)	Abstract	Yes	Yes. It is a technical database. They did not narrate individual cases.
267	ID: CN-00567335 AU: Muenzer J AU: Wraith JE AU: Beck M AU: Giugliani R TI: A phase II/III clinical study of enzyme replacement therapy with idursulfase in mucopolysaccharidosis II (Hunter syndrome) SO: Genetics in medicine YR: 2006 VL: 8 NO: 8 PG: 465-473 US: http://cochranelibrary-wiley.com/o/cochrane/clcentral/articles/335/CN-00567335/frame.html	Abstract	Yes	Yes. The results are aggregated. They did not narrate individual cases.
268	ID: CN-00908140 AU: Sohn YB AU: Cho SY AU: Park SW AU: Kim SJ AU: Ko A-R AU: Kwon E-K AU: Han SJ AU: Jin D-K TI: Phase I/II clinical trial of enzyme replacement therapy with idursulfase beta in patients with mucopolysaccharidosis II (Hunter Syndrome) SO: Orphanet journal of rare diseases YR: 2013 VL: 8 NO: 1 DOI: 10.1186/1750-1172-8-42 US: http://cochranelibrary-wiley.com/o/cochrane/clcentral/art…	Abstract	Yes	Yes. The results are aggregated. They did not narrate individual cases.
269	Record #3 of 24 ID: CN-01062287 AU: Sohn YB AU: Cho SY AU: Park SW AU: Kim SJ AU: Ko AR AU: Kwon EK AU: Han SJ AU: Jin DK TI: Phase I/II clinical trial of enzyme replacement therapy with idursulfase beta in patients with mucopolysaccharidosis II (Hunter Syndrome) SO: Journal of inherited metabolic disease. YR: 2013 VL: 36 NO: 2 SUPPL. 1 PG: S260 XR: EMBASE 71345887 PT: Journal: Conference Abstrac…	Abstract	Yes	Yes. The results are aggregated. They did not narrate individual cases.
270	Record #4 of 24 ID: CN-00964871 AU: Sohn YB AU: Cho SY AU: Park SW AU: Kim SJ AU: Ko AR AU: Kwon EK AU: Han SJ AU: Jin DK TI: Phase I/II clinical trial of enzyme replacement therapy with idursulfase beta in patients with mucopolysaccharidosis II (Hunter syndrome) SO: Orphanet journal of rare diseases YR: 2013 VL: 8 PG: 42 PM: PUBMED 23497636 CC: SR-CF DOI: 10.1186/1750-1172-8-42 US: http://cochra…	Abstract	Yes	Yes. The results are aggregated. They did not narrate individual cases.
271	ID: CN-00577406 AU: Muenzer J AU: Gucsavas-Calikoglu M AU: McCandless SE AU: Schuetz TJ AU: Kimura A TI: A phase I/II clinical trial of enzyme replacement therapy in mucopolysaccharidosis II (Hunter syndrome) SO: Molecular genetics and metabolism YR: 2007 VL: 90 NO: 3 PG: 329-337 PM: PUBMED 17185020 CC: SR-CF DOI: 10.1016/j.ymgme.2006.09.001 US: http://cochranelibrary-wiley.com/o/cochrane/clcentr…	Abstract	Yes	Yes. The results are aggregated. They did not narrate individual cases.
272	ID: CN-01308057 AU: Muenzer J AU: Burton BK AU: Harmatz P AU: Villarreal MLS AU: Amartino HM AU: Ruiz-Garcia M AU: Gutierrez-Solana LG AU: Sciarappa K AU: Alexanderian D AU: Jones SA TI: A phase II/III intrathecal enzyme replacement therapy clinical trial for MPS II patients with cognitive impairment SO: Molecular genetics and metabolism YR: 2016 VL: Conference: 12th Annual WORLDSymposium 2016 Sa…	Abstract	Yes	Yes. The results are aggregated. They did not narrate individual cases.
273	ID: CN-01361929 AU: Muenzer J AU: Hendriksz CJ AU: Stein MB AU: Fan Z AU: Kearney S AU: Horton J AU: Vijayaraghavan S AU: Santra S AU: Solanki GA AU: Pan L AU: Alexanderian D TI: A long-term extension study evaluating intrathecal idursulfase-IT in children with Hunter syndrome and cognitive impairment SO: Molecular genetics and metabolism. Conference: 13th annual worldsymposium 2017. United state…	Abstract	Yes	Yes. The results are aggregated. They did not narrate individual cases.
274	ID: CN-00977628 AU: Sohn YB AU: Cho SY AU: Park SW AU: Kim SJ AU: Ko AR AU: Kwon EK TI: Phase I/II clinical trial of enzyme replacement therapy with idursulfase beta in patients with mucopolysaccharidosis II (Hunter Syndrome) SO: Journal of inherited metabolic disease YR: 2013 VL: 36 Suppl 2 PG: S260, Abstract no: P-565 CC: SR-CF US: http://cochranelibrary-wiley.com/o/cochrane/clcentral/articles/…	Abstract	Yes	Yes. The results are aggregated. They did not narrate individual cases.
275	Record #9 of 24 ID: CN-00627103 AU: Gutiérrez-Solana LG TI: Clinical study of enzyme replacement therapy with idursulfase SO: Revista de neurologia YR: 2007 VL: 44 Suppl 1 PG: S7-S11 PM: PUBMED 17345556 PT: Clinical Trial, Phase I; Clinical Trial, Phase II; English Abstract; Journal Article; Randomized Controlled Trial KY: Adolescent;Double-Blind Method;Iduronate Sulfatase [therapeutic use];Mucop…	Abstract	Yes	Yes. The results are aggregated. They did not narrate individual cases.
276	ID: CN-01133961 AU: Muenzer J AU: Hendriksz CJ AU: Fan Z AU: Vijayaraghavan S AU: Perry V AU: Santra S AU: Solanki GA AU: Mascelli MA AU: Pan L AU: Wang N AU: Sciarappa K AU: Barbier AJ TI: A phase I/II study of intrathecal idursulfase-IT in children with severe mucopolysaccharidosis II SO: Genetics in medicine YR: 2016 VL: 18 NO: 1 PG: 73-81 PM: PUBMED 25834948 XR: EMBASE 20160050212 DOI: 10.103…	Abstract	Yes	Yes. The results are aggregated. They did not narrate individual cases.
277	ID: CN-00780474 AU: Muenzer J AU: Beck M AU: Eng CM AU: Giugliani R AU: Harmatz P AU: Martin R AU: Ramaswami U AU: Vellodi A AU: Wraith JE AU: Cleary M AU: Gucsavas-Calikoglu M AU: Puga AC AU: Shinawi M AU: Ulbrich B AU: Vijayaraghavan S AU: Wendt S AU: Conway AM AU: Rossi A AU: Whiteman DA AU: Kimura A TI: Long-term, open-labeled extension study of idursulfase in the treatment of Hunter syndrome…	Abstract	Yes	Yes. The results are aggregated. They did not narrate individual cases.
278	ID: CN-00913836 AU: Barbier AJ AU: Bielefeld B AU: Whiteman DAH AU: Natarajan M AU: Pano A AU: Amato DA TI: The relationship between anti-idursulfase antibody status and safety and efficacy outcomes in attenuated mucopolysaccharidosis II patients aged 5years and older treated with intravenous idursulfase SO: Molecular genetics and metabolism YR: 2013 VL: 110 NO: 3 PG: 303-310 PM: PUBMED 23988379 …	Abstract	Yes	Yes. The results are aggregated. They did not narrate individual cases.
279	Record #13 of 24 ID: CN-00723803 AU: Muenzer J AU: Towle D AU: Calikoglu M AU: McCandless S TI: The 12-month experience of enzyme replacement for mucopolysaccharidosis II (Hunter syndrome) SO: Journal of inherited metabolic disease YR: 2003 VL: 26 Suppl 2 PG: 144, Abstract no: 288-O CC: HS-HANDSRCH: SR-CF US: http://cochranelibrary-wiley.com/o/cochrane/clcentral/articles/803/CN-00723803/frame.html	Abstract	Yes	Yes. The results are aggregated. They did not narrate individual cases.
280	Record #14 of 24 ID: CN-01089492 TI: Clinical effect of intrathecal enzyme replacement therapy with investigational idursulfase-IT in children with Hunter syndrome SO: Journal of inherited metabolic disease YR: 2015 VL: 38 NO: ue 1 Suppl PG: Abstract no: O-048 CC: SR-CF US: http://cochranelibrary-wiley.com/o/cochrane/clcentral/articles/492/CN-01089492/frame.html	Abstract	Yes	Yes. The results are aggregated. They did not narrate individual cases.
281	ID: CN-00723799 AU: Beck M AU: Wraith E AU: Muenzer J AU: Giugliani R AU: Harmatz P AU: Eng CM AU: Vellodi A AU: Martin R AU: Ramaswami U AU: Calikoglu M AU: Vijayaraghavan S AU: Puga AC AU: Ulbrich B AU: Shinawi M AU: Cleary M AU: Wendt S TI: Long-term weekly dosing of idursulfase in the treatment of mucopolysaccharidosis II (MPS II, Hunter syndrome) SO: Journal of inherited metabolic disease YR…	Abstract	Yes	Yes. The results are aggregated. They did not narrate individual cases.
282	ID: CN-01016396 AU: Schulze-Frenking G AU: Jones SA AU: Roberts J AU: Beck M AU: Wraith JE TI: Effects of enzyme replacement therapy on growth in patients with mucopolysaccharidosis type II SO: Journal of inherited metabolic disease YR: 2011 VL: 34 NO: 1 PG: 203-208 PM: PUBMED 20978944 XR: EMBASE 51126635 PT: Journal: Article DOI: 10.1007/s10545-010-9215-2 US: http://cochranelibrary-wiley.com/o/c…	Abstract	Yes	Yes. The results are aggregated. They did not narrate individual cases.
283	ID: CN-00899451 AU: Beusterien KM AU: Yeung J-E AU: Pang F AU: Brazier J TI: Development of the multi-attribute Adolescent Health Utility Measure (AHUM) SO: Health and quality of life outcomes YR: 2012 VL: 10 XR: EMBASE 52185334 DOI: 10.1186/1477-7525-10-102 US: http://cochranelibrary-wiley.com/o/cochrane/clcentral/articles/451/CN-00899451/frame.html	Abstract	Yes	Yes. The results are aggregated. They did not narrate individual cases.
284	ID: CN-01213476 AU: Burton BK AU: Jego V AU: Mikl J AU: Jones SA TI: Survival in idursulfase-treated and untreated patients with mucopolysaccharidosis type II: data fromtheHunterOutcome Survey (HOS) SO: Journal of inherited metabolic disease YR: 2016 VL: Conference: Annual Symposium of the Society for the Study of Inborn Errors of Metabolism, SSIEM 2016. Italy. Conference Start: 20160906. Confere…	Abstract	Yes	Yes. The results are aggregated. They did not narrate individual cases.
285	Record #19 of 24 ID: CN-00723802 AU: Tylki-Szymanska A AU: Giugliani R AU: Hwu WL TI: A clinical trial of idursulfase in Hunter syndrome patients 5 years old and younger SO: Journal of inherited metabolic disease YR: 2008 VL: 31 Suppl 1 PG: 130, Abstract no: 516-P CC: SR-CF US: http://cochranelibrary-wiley.com/o/cochrane/clcentral/articles/802/CN-00723802/frame.html	Abstract	Yes	Yes. The results are aggregated. They did not narrate individual cases.
286	ID: CN-01361897 AU: Giugliani R AU: Scarpa M AU: Tylki-Szymanska A TI: Clinical outcomes after 3 years of idursulfase treatment in patients with MPS II: data from the Hunter Outcome Survey (HOS) SO: Molecular genetics and metabolism. Conference: 13th annual worldsymposium 2017. United states YR: 2017 VL: 120 NO: 1-2 PG: S56 XR: EMBASE 614617413 PT: Conference Abstract DOI: 10.1016/j.ymgme.2016.11…	Abstract	Yes	Yes. The results are aggregated. They did not narrate individual cases. Es el abstract del ensayo 80
287	ID: CN-00723800 AU: Muenzer J AU: Calikoglu MG AU: Conway AM AU: Kimura A TI: The long-term experience of enzyme replacement therapy for Hunter syndrome (MPS II) SO: Journal of inherited metabolic disease YR: 2005 VL: 28 Suppl 1 PG: 188, Abstract no: 373-O CC: SR-CF US: http://cochranelibrary-wiley.com/o/cochrane/clcentral/articles/800/CN-00723800/frame.html	Abstract	Yes	Yes. The results are aggregated. They did not narrate individual cases.
288	ID: CN-01034476 AU: Wiklund I TI: Assessing the reliability, validity, and responsiveness to change of the hunter syndrome-functional outcomes for clinical understanding scale (HS-FOCUS) SO: Molecular genetics and metabolism. YR: 2012 VL: 105 NO: 2 PG: S65-S66 XR: EMBASE 70702127 PT: Journal: Conference Abstract DOI: 10.1016/j.ymgme.2011.11.177	Abstract	Yes	Yes. The results are aggregated. They did not narrate individual cases.
289	Record #24 of 24 ID: CN-01361931 AU: Polgreen LE AU: Kunin-Batson A AU: Rudser K AU: Vehe RK AU: Utz JJ AU: Whitley CB AU: Dickson P TI: Pilot study of the effect of adalimumab on pain, physical function, and musculoskeletal disease in mucopolysaccharidosis types i and II SO: Molecular genetics and metabolism. Conference: 13th annual worldsymposium 2017. United states YR: 2017 VL: 120 NO: 1-2 PG:…	Abstract	Yes	Yes. The results are aggregated. They did not narrate individual cases. Es el abstract del ensayo 7 y 23CT
